# Supplementary material for: Genome-Wide Association Study for Serum Omega-3 and Omega-6 Polyunsaturated Fatty Acids: Exploratory Analysis of the Sex-Specific Effects and Dietary Modulation in Mediterranean Subjects with Metabolic Syndrome
Source: PubMed Central journal article supplement (PMC7071282; doi:10.3390/nu12020310), 2020-01-24
Supplement: nutrients-12-00310-s001.pdf [file nutrients-12-00310-s001.pdf]

## ONLINE SUPPORTING MATERIAL

### **Genome-Wide Association Study for Serum Omega-3 and Omega-6 Polyunsaturated Fatty Acids: Exploratory Analysis of the Sex-Specific Effects and Dietary Modulation in Mediterranean Subjects with Metabolic Syndrome**

Oscar Coltell, Jose V. Sorlí, Eva M. Asensio, Rocío Barragán, José I. González, Ignacio M. Giménez-Alba, Vicente Zanón-Moreno, Ramon Estruch, Judith B Ramírez-Sabio, Eva C. Pascual, Carolina Ortega-Azorín, Jose M Ordovas and Dolores Corella

|                              |    |
|------------------------------|----|
| Supplemental Figure 1 .....  | 2  |
| Supplemental Table 1.....    | 3  |
| Supplemental Table 2.....    | 4  |
| Supplemental Figure 2.....   | 5  |
| Supplemental Table 3.....    | 6  |
| Supplemental Figure 3 .....  | 7  |
| Supplemental Figure 4 .....  | 8  |
| Supplemental Figure 5 .....  | 9  |
| Supplemental Figure 6 .....  | 10 |
| Supplemental Table 4.....    | 11 |
| Supplemental Figure 7 .....  | 12 |
| Supplemental Figure 8 .....  | 13 |
| Supplemental Table 5.....    | 14 |
| Supplemental Figure 9 .....  | 15 |
| Supplemental Table 6.....    | 16 |
| Supplemental Table 7.....    | 17 |
| Supplemental Table 8.....    | 18 |
| Supplemental Table 9.....    | 19 |
| Supplemental Table 10.....   | 20 |
| Supplemental Table 11.....   | 21 |
| Supplemental Table 12.....   | 22 |
| Supplemental Figure 10 ..... | 23 |
| Supplemental Figure 11 ..... | 24 |
| References .....             | 25 |

**Supplemental Figure 1.** Conversion flow of Omega-3 and Omega-6 fatty acids, respectively modulated by FADS1/2 and ELOVL2/5 enzymes, from linoleic acid to  $\beta$ -docosapentaenoic fatty acid and from  $\alpha$ -linolenic fatty acid to docosahexaenoic acid. Adapted from [1-3].

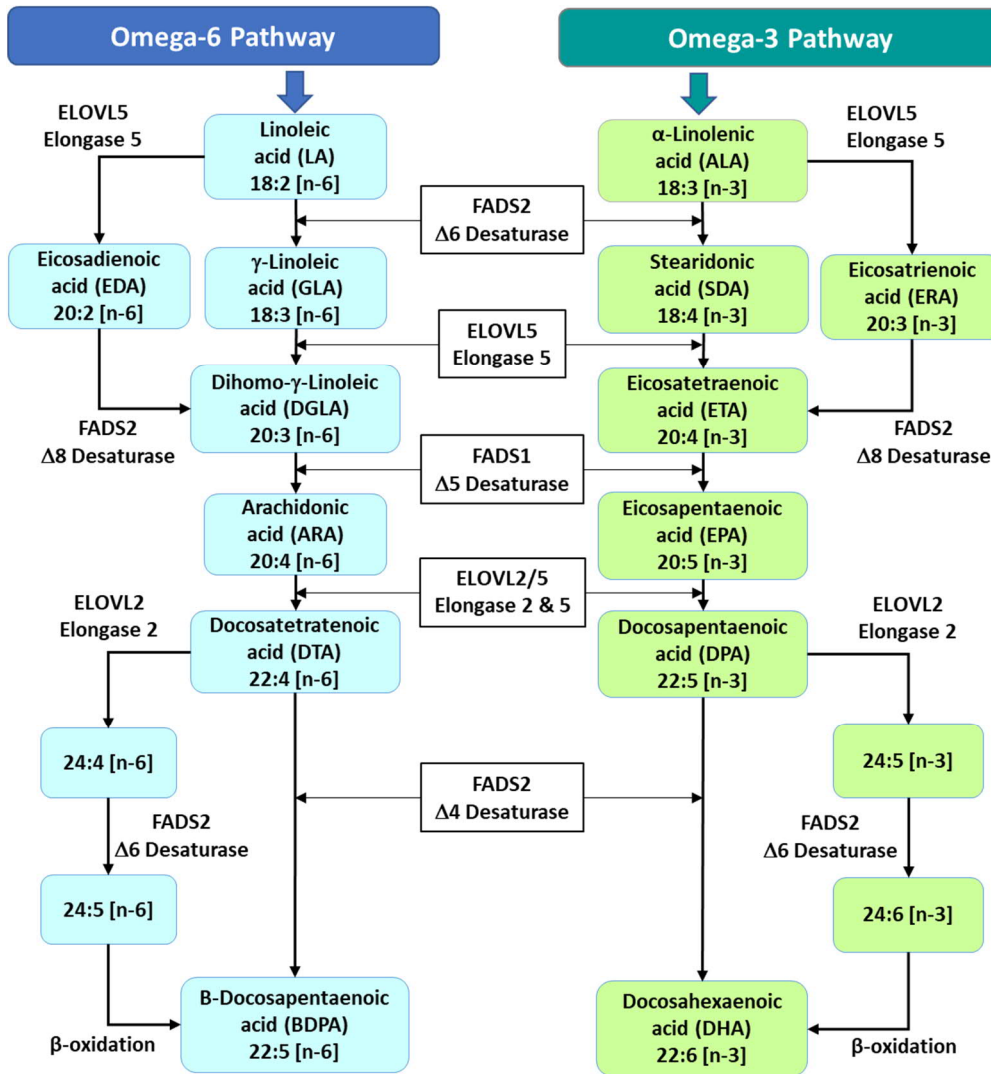

**Supplemental Table 1.** Quantitative 17-item questionnaire for Adherence to Mediterranean diet.

| Food items and frequency of consumption                                                                                                                                                           | Criteria for 1 point <sup>1</sup>                     |
|---------------------------------------------------------------------------------------------------------------------------------------------------------------------------------------------------|-------------------------------------------------------|
| 1. Do you use olive oil as main culinary fat?                                                                                                                                                     | Yes                                                   |
| 2. How many vegetable servings do you consume per day? (1 serving = 200g [consider side dish as half serving])                                                                                    | ≥2 (≥1 portion raw or as salad)                       |
| 3. How many fruit units (including natural fruit juices) do you consume per day?                                                                                                                  | ≥3                                                    |
| 4. How many servings of red meat, hamburger or meat products (ham, sausage, etc.) do you consume per week? (1 serving = 100–150g)                                                                 | <1                                                    |
| 5. How many servings of butter, margarine, or cream do you consume per week? (1 serving = 12g)                                                                                                    | <1                                                    |
| 6. How many sweetened beverages (soft drinks, cola, bitter, juices without added sugars) do you drink per week?                                                                                   | <1                                                    |
| 7. How many servings of legumes do you consume per week? (1 serving = 150g)                                                                                                                       | ≥3                                                    |
| 8. How many servings of fish or shellfish do you consume per week? (1 serving = 100-150g of fish or 4-5 units or 200g of shellfish)                                                               | ≥3                                                    |
| 9. How many times per week do you consume pastries, such as cookies, custard, sweets or cakes?                                                                                                    | <3                                                    |
| 10. How many servings of nuts (including peanuts) do you consume per week? (1 serving = 30g)                                                                                                      | ≥1                                                    |
| 11. Do you preferentially consume chicken, turkey, or rabbit meat instead of veal, pork, hamburger, or sausage?                                                                                   | Yes                                                   |
| 12. How many times per week do you consume vegetables, pasta, rice, or other dishes seasoned with <i>sofrito</i> (sauce made with tomato and onion, leek, or garlic and simmered with olive oil)? | ≥2                                                    |
| 13. Do you add sugar to the coffee or tea?                                                                                                                                                        | No/use artificial sweeteners                          |
| 14. How many servings of white bread do you consume per day? (1 serving = 75g)                                                                                                                    | <1                                                    |
| 15. How many servings of cereals and whole grains (bread, rice, pasta) do you consume per week?                                                                                                   | ≥5                                                    |
| 16. How many servings of white bread, rice and/or pasta do you consume per week?                                                                                                                  | <3                                                    |
| 17. How much wine do you drink per week?                                                                                                                                                          | 2-3 glasses/day for men and 1-2 glasses/day for women |

<sup>1</sup> '0' points if these criteria are not met.

**Supplemental Table 2.** Other medications<sup>1</sup> of the study population by sex.

|                                              | Total (n=426) | Men (n=187) | Women (n=239) | p      |
|----------------------------------------------|---------------|-------------|---------------|--------|
| Other antidiabetic drugs <sup>2</sup> : n, % | 121 (28.4)    | 56 (29.9)   | 65 (27.2)     | 0.532  |
| Treatments for pain and fever: n, %          | 88 (20.7)     | 25 (13.4)   | 63 (26.4)     | 0.001  |
| Anti-platelet drugs: n, %                    | 50 (1.7)      | 23 (12.3)   | 27 (11.3)     | 0.750  |
| Tranquilizers-sedative-hypnotic: n, %        | 130 (30.5)    | 22 (11.8)   | 108 (45.2)    | <0.001 |
| Vitamins and minerals: n, %                  | 51 (12.0)     | 11 (5.9)    | 40 (16.7)     | 0.001  |
| Cardio protective drugs: n, %                | 25 (5.9)      | 11 (5.9)    | 14 (5.9)      | 0.991  |

Values are numbers and %. p: p-value for the comparisons of % between men and women; <sup>1</sup>: Self-reported medications taken during the last month; <sup>2</sup>: Other antidiabetic medications include treatments used as a single oral agent or combined with one or more antidiabetic drugs.

**Supplemental Figure 2.** Q-Q plot for the GWAS on serum omega-3 fatty acid concentrations (%) in the whole population.

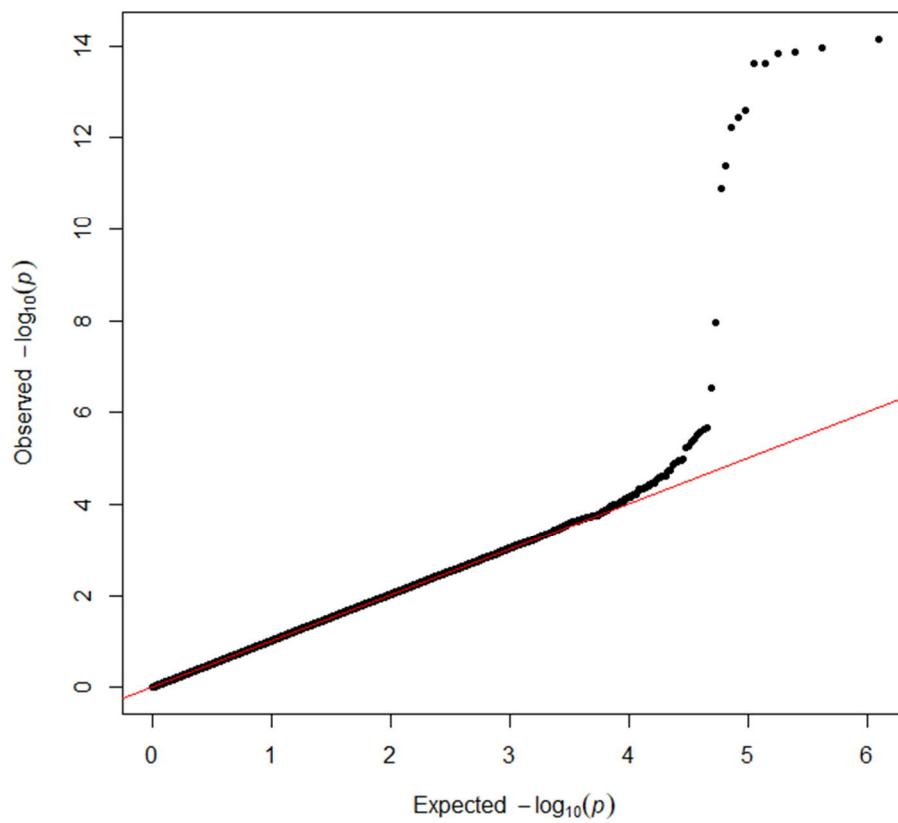

**Supplemental Table 3.** Genome-wide interaction study with adherence to Mediterranean diet in determining serum omega-3 fatty acid concentrations (%) in the whole population. Top-ranked SNP\*diet interaction terms.

| Chr | SNP        | Beta <sup>1</sup> | SE <sup>1</sup> | Beta <sup>2</sup> | SE <sup>2</sup> | $P_{\text{Gene*AdhMedDiet}}$ | Alleles | MAF      | Gene       |
|-----|------------|-------------------|-----------------|-------------------|-----------------|------------------------------|---------|----------|------------|
|     |            |                   |                 |                   |                 | Interaction <sup>3</sup>     |         |          |            |
| 6   | rs3798890  | 0.199             | 0.064           | -0.292            | 0.070           | 2.15×10 <sup>-07</sup>       | A       | 0.193091 | ME1        |
| 6   | rs6917851  | 0.203             | 0.064           | -0.286            | 0.070           | 2.17×10 <sup>-07</sup>       | A       | 0.192093 | ME1        |
| 6   | rs1180204  | 0.248             | 0.064           | -0.211            | 0.065           | 4.98×10 <sup>-07</sup>       | A       | 0.398163 | ME1        |
| 6   | rs12191369 | 0.197             | 0.066           | -0.290            | 0.072           | 5.46×10 <sup>-07</sup>       | C       | 0.188498 | ME1        |
| 6   | rs12203860 | 0.200             | 0.063           | -0.264            | 0.069           | 7.05×10 <sup>-07</sup>       | G       | 0.279952 | intergenic |
| 6   | rs6454330  | 0.187             | 0.064           | -0.278            | 0.069           | 7.67×10 <sup>-07</sup>       | C       | 0.217452 | intergenic |
| 3   | rs6781156  | 0.180             | 0.061           | -0.262            | 0.067           | 1.03×10 <sup>-06</sup>       | A       | 0.26877  | intergenic |
| 6   | rs1180241  | 0.306             | 0.067           | -0.180            | 0.074           | 1.07×10 <sup>-06</sup>       | A       | 0.184704 | ME1        |
| 1   | rs4661702  | 0.192             | 0.066           | -0.279            | 0.071           | 1.10×10 <sup>-06</sup>       | G       | 0.247804 | intergenic |
| 3   | rs7641425  | 0.180             | 0.061           | -0.271            | 0.070           | 1.15×10 <sup>-06</sup>       | T       | 0.296326 | intergenic |
| 6   | rs13219666 | 0.294             | 0.065           | -0.185            | 0.074           | 1.22×10 <sup>-06</sup>       | C       | 0.14357  | intergenic |
| 6   | rs1180237  | 0.246             | 0.064           | -0.192            | 0.065           | 1.73×10 <sup>-06</sup>       | C       | 0.433307 | ME1        |
| 6   | rs1180187  | 0.255             | 0.064           | -0.187            | 0.067           | 2.12×10 <sup>-06</sup>       | A       | 0.46845  | ME1        |
| 6   | rs983087   | 0.307             | 0.065           | -0.151            | 0.072           | 2.41×10 <sup>-06</sup>       | C       | 0.226438 | ME1        |
| 6   | rs9444043  | 0.236             | 0.064           | -0.193            | 0.067           | 3.72×10 <sup>-06</sup>       | A       | 0.495008 | intergenic |
| 2   | rs16866554 | 0.268             | 0.118           | -0.533            | 0.127           | 3.84×10 <sup>-06</sup>       | A       | 0.135184 | CCDC141    |
| 13  | rs765061   | 0.277             | 0.089           | -0.325            | 0.097           | 5.00×10 <sup>-06</sup>       | A       | 0.166534 | intergenic |
| 6   | rs1535588  | 0.203             | 0.063           | -0.224            | 0.069           | 5.24×10 <sup>-06</sup>       | C       | 0.315895 | ME1        |
| 6   | rs1144180  | 0.269             | 0.068           | -0.201            | 0.078           | 5.88×10 <sup>-06</sup>       | G       | 0.200879 | ME1        |
| 6   | rs1170485  | 0.208             | 0.064           | -0.220            | 0.070           | 6.08×10 <sup>-06</sup>       | T       | 0.315296 | ME1        |
| 3   | rs2971365  | 0.265             | 0.099           | -0.347            | 0.093           | 7.13×10 <sup>-06</sup>       | C       | 0.313898 | intergenic |
| 8   | rs7013384  | 0.633             | 0.150           | -0.383            | 0.171           | 8.10×10 <sup>-06</sup>       | A       | 0.186102 | intergenic |
| 8   | rs6583593  | 0.636             | 0.154           | -0.386            | 0.171           | 8.66×10 <sup>-06</sup>       | T       | 0.148762 | intergenic |
| 6   | rs1180195  | 0.253             | 0.063           | -0.150            | 0.065           | 9.03×10 <sup>-06</sup>       | T       | 0.449481 | ME1        |
| 20  | rs11699833 | 0.247             | 0.065           | -0.189            | 0.074           | 9.06×10 <sup>-06</sup>       | A       | 0.251398 | intergenic |
| 6   | rs1180192  | 0.312             | 0.067           | -0.137            | 0.076           | 9.41×10 <sup>-06</sup>       | T       | 0.205871 | ME1        |

<sup>1</sup> SNP: Single Nucleotide Polymorphisms. Only top-ranked SNPs with P-value < 1×10<sup>-5</sup> for SNP\*diet interaction terms in the whole population (n=426) are listed. A 17-item screening questionnaire was used for assessing adherence to Mediterranean diet, defining two groups based on the sample median (8 points): Low adherence to MedDiet (0–8 points), and High adherence to MedDiet (9–17 points). Chr: Chromosome. Beta: Indicates the regression coefficients per one minor allele. SE: Standard error. MAF: Minor allele frequency. Beta<sup>1</sup>: indicates the regression coefficients for the low adherence to Mediterranean diet strata (n=248). Beta<sup>2</sup>: indicates the regression coefficients for the high adherence to Mediterranean diet strata (n=178). <sup>3</sup> P-value obtained for the interaction term SNP\*AdhMedDiet in the corresponding hierarchical GLM regression model including the main effects.

**Supplemental Figure 3.** Q-Q plot for the genome-wide interaction study with adherence to Mediterranean diet in determining serum omega-3 fatty acid concentrations (%) in the whole population.

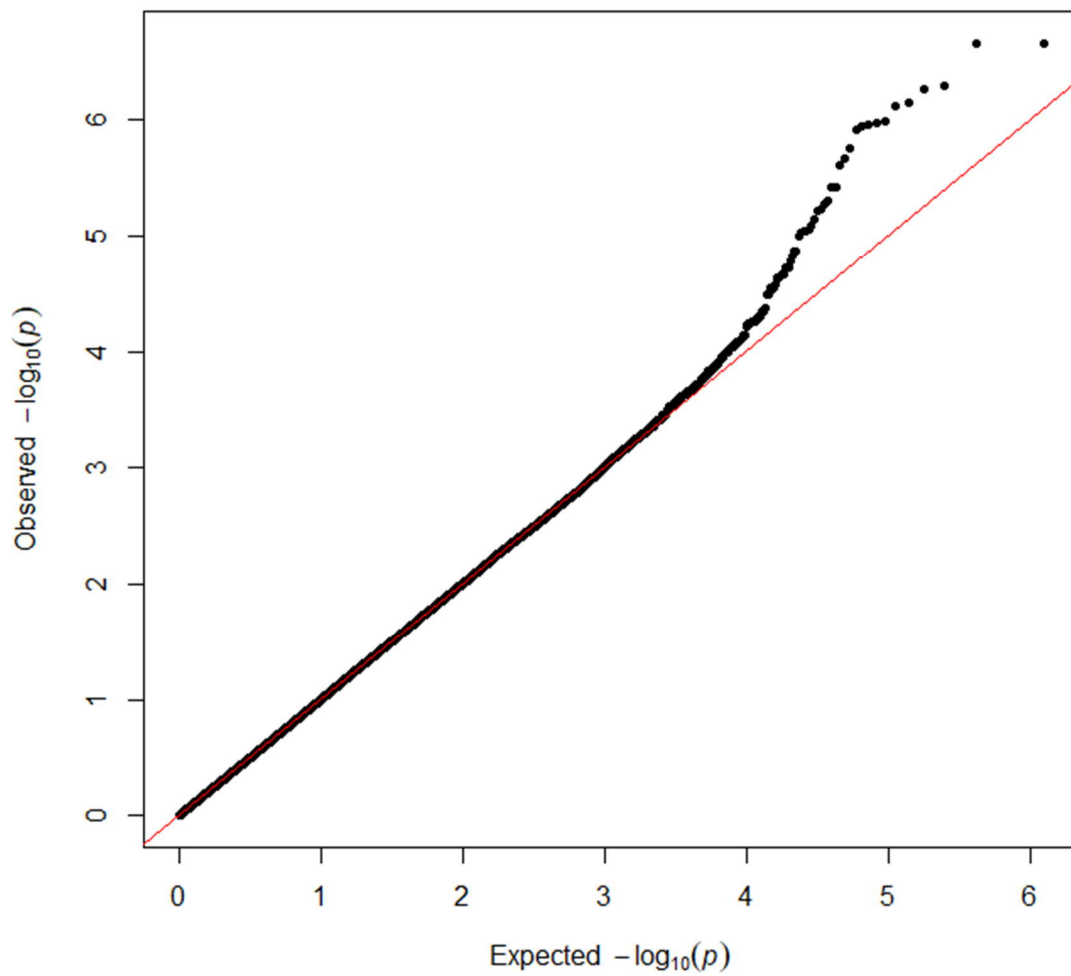

**Supplemental Figure 4.** Q-Q plot for the GWAS on total docosahexaenoic fatty acid concentrations (%) in the whole population.

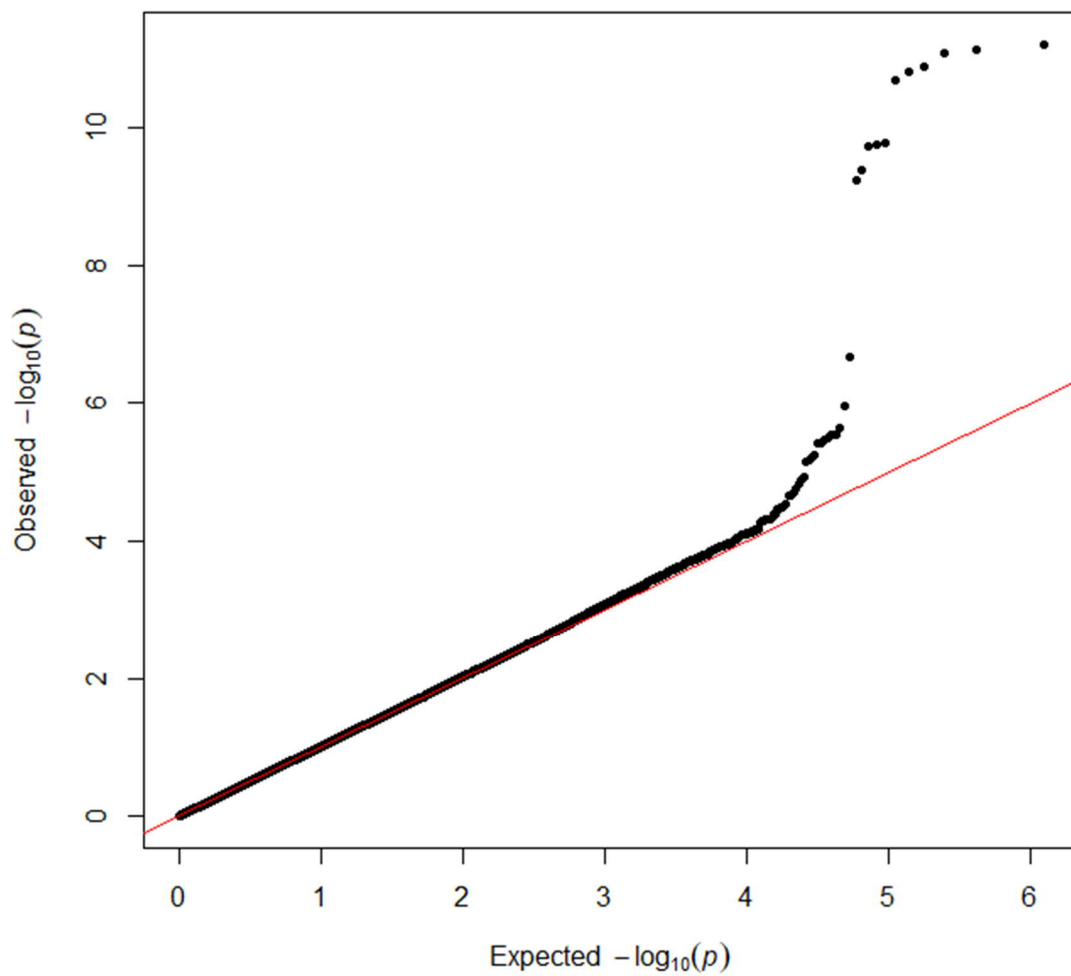



**Supplemental Figure 5.** Manhattan plot for the GWAs results for the serum omega-6 fatty acid (%) in the whole population. Associations were obtained from the genetic additive model and  $p$ -values were expressed as  $-\log_{10}(p\text{-value})$ . The red line represents the threshold for GWAS statistical significance ( $-\log_{10}(5 \times 10^{-8})$ ). The blue line represents the threshold for suggestive GWAS significance ( $-\log_{10}(1 \times 10^{-5})$ ).

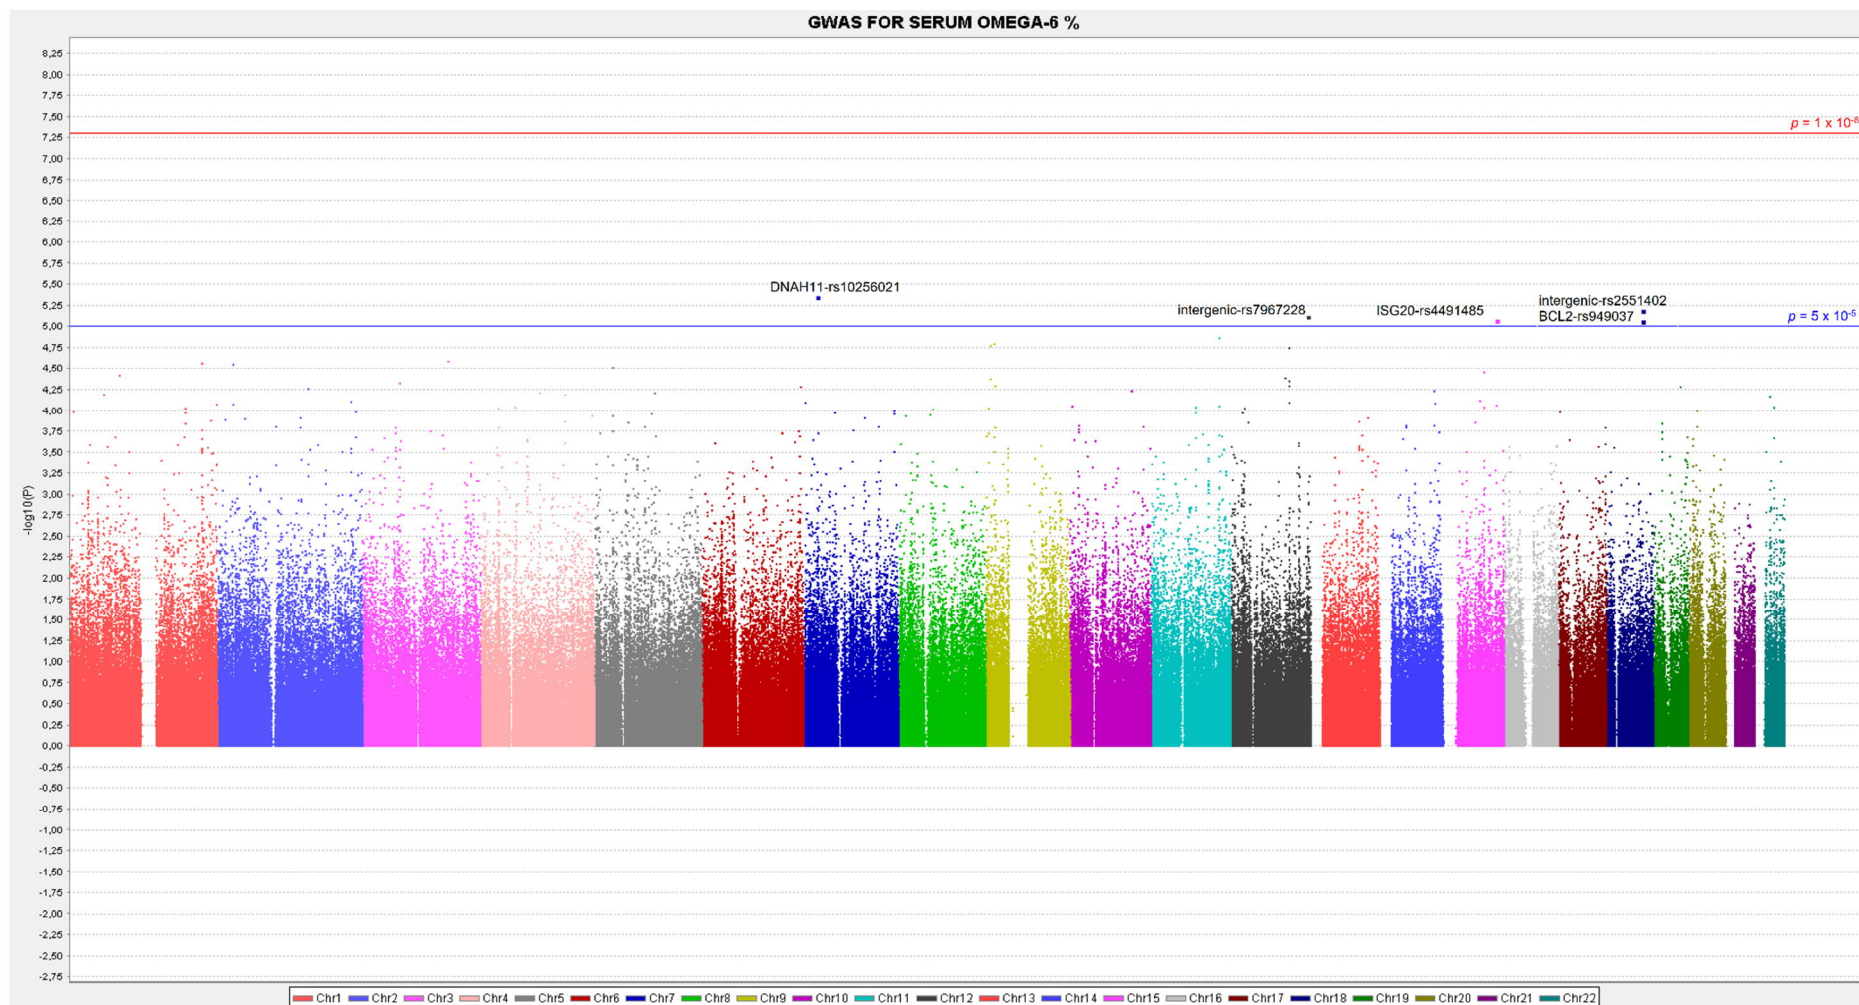

**Supplemental Figure 6.** Q-Q plot for the GWAS on serum omega-6 fatty acid concentrations (%) in the whole population.

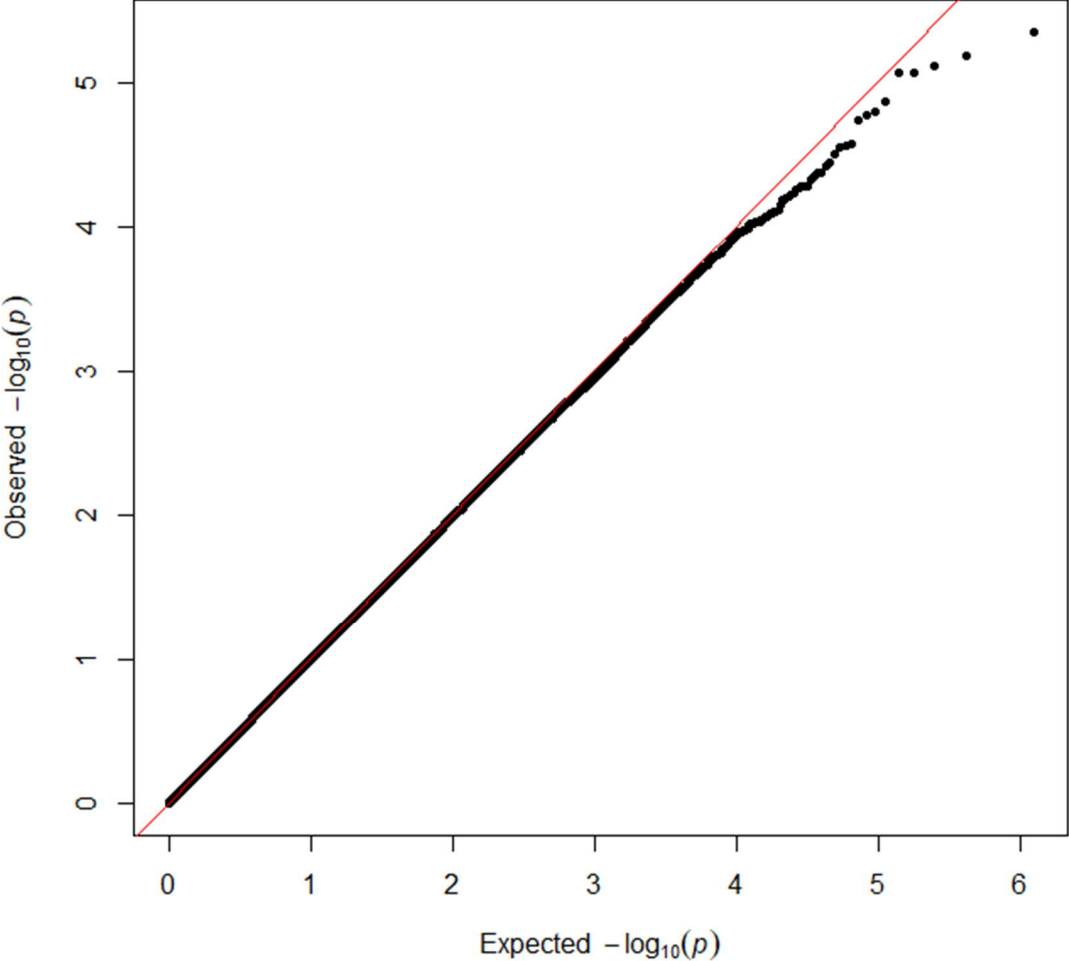

**Supplemental Table 4.** Top-ranked SNPs in the GWAS for serum omega-6 fatty acid concentrations (%) in the whole population.

| Unadjusted <sup>1</sup> |            |              |                       |         |       |                   |                 |                                 |                        | Adjusted <sup>2</sup> |            |            |       |                   |                        |
|-------------------------|------------|--------------|-----------------------|---------|-------|-------------------|-----------------|---------------------------------|------------------------|-----------------------|------------|------------|-------|-------------------|------------------------|
| Chr                     | SNP        | Gene         | Position <sup>3</sup> | Alleles | MAF   | Beta <sup>1</sup> | SE <sup>1</sup> | R <sup>2</sup> ( <sup>1</sup> ) | p <sup>1</sup>         | Chr                   | SNP        | Gene       | MAF   | Beta <sup>2</sup> | p <sup>2</sup>         |
| 7                       | rs10256021 | DNAH11       | 21801878              | G       | 0.355 | -0.706            | 0.152           | 0.049                           | 4.42×10 <sup>-06</sup> | 15                    | rs4491485  | ISG20      | 0.248 | -1.214            | 1.97×10 <sup>-06</sup> |
| 18                      | rs2551402  | intergenic   | 60990022              | C       | 0.456 | 0.664             | 0.145           | 0.047                           | 6.49×10 <sup>-06</sup> | 18                    | rs2551402  | intergenic | 0.456 | 0.682             | 3.52×10 <sup>-06</sup> |
| 12                      | rs7967228  | intergenic   | 127840232             | G       | 0.499 | -0.667            | 0.147           | 0.046                           | 7.71×10 <sup>-06</sup> | 18                    | rs949037   | BCL2       | 0.403 | 0.667             | 4.84×10 <sup>-06</sup> |
| 15                      | rs4491485  | ISG20        | 89180746              | G       | 0.248 | -1.133            | 0.252           | 0.046                           | 8.57×10 <sup>-06</sup> | 7                     | rs10256021 | DNAH11     | 0.355 | -0.700            | 5.32×10 <sup>-06</sup> |
| 18                      | rs949037   | BCL2         | 60979013              | A       | 0.403 | 0.648             | 0.144           | 0.046                           | 8.65×10 <sup>-06</sup> | 12                    | rs7967228  | intergenic | 0.499 | -0.648            | 1.54×10 <sup>-05</sup> |
| 11                      | rs6589490  | CADM1        | 115131900             | G       | 0.350 | 0.621             | 0.141           | 0.044                           | 1.37×10 <sup>-05</sup> | 11                    | rs6589490  | CADM1      | 0.350 | 0.617             | 1.60×10 <sup>-05</sup> |
| 9                       | rs7047109  | intergenic   | 14555896              | C       | 0.125 | -0.833            | 0.191           | 0.043                           | 1.60×10 <sup>-05</sup> | 9                     | rs7047109  | intergenic | 0.125 | -0.831            | 1.74×10 <sup>-05</sup> |
| 9                       | rs12002314 | intergenic   | 7694465               | G       | 0.177 | -0.795            | 0.183           | 0.043                           | 1.69×10 <sup>-05</sup> | 5                     | rs1921111  | intergenic | 0.262 | 0.671             | 2.61×10 <sup>-05</sup> |
| 12                      | rs252181   | intergenic   | 97283633              | T       | 0.456 | 0.652             | 0.150           | 0.043                           | 1.80×10 <sup>-05</sup> | 3                     | rs815710   | intergenic | 0.323 | -0.609            | 2.68×10 <sup>-05</sup> |
| 3                       | rs4839595  | SLC9A9       | 143163169             | G       | 0.427 | -0.618            | 0.145           | 0.041                           | 2.63×10 <sup>-05</sup> | 9                     | rs12002314 | intergenic | 0.177 | -0.780            | 2.70×10 <sup>-05</sup> |
| 1                       | rs17478205 | DISP1        | 223162746             | A       | 0.391 | -0.608            | 0.143           | 0.041                           | 2.72×10 <sup>-05</sup> | 12                    | rs252181   | intergenic | 0.456 | 0.640             | 2.73×10 <sup>-05</sup> |
| 2                       | rs6712986  | ADCY3        | 25126046              | C       | 0.203 | 0.885             | 0.209           | 0.041                           | 2.80×10 <sup>-05</sup> | 2                     | rs6712986  | ADCY3      | 0.203 | 0.873             | 3.86×10 <sup>-05</sup> |
| 5                       | rs1921111  | intergenic   | 30870858              | A       | 0.262 | 0.663             | 0.157           | 0.040                           | 3.09×10 <sup>-05</sup> | 14                    | rs2540875  | GPR68      | 0.187 | -0.865            | 4.00×10 <sup>-05</sup> |
| 15                      | rs430610   | intergenic   | 68198622              | G       | 0.477 | -0.591            | 0.141           | 0.040                           | 3.51×10 <sup>-05</sup> | 3                     | rs4839595  | SLC9A9     | 0.427 | -0.605            | 4.02×10 <sup>-05</sup> |
| 1                       | rs876339   | LOC107985396 | 83340310              | C       | 0.209 | -0.697            | 0.167           | 0.040                           | 3.76×10 <sup>-05</sup> | 7                     | rs6980380  | PRKAG2     | 0.124 | 0.759             | 4.34×10 <sup>-05</sup> |
| 12                      | rs2723934  | LOC102724834 | 91013303              | A       | 0.376 | 0.639             | 0.154           | 0.039                           | 4.15×10 <sup>-05</sup> | 2                     | rs2222760  | RND3       | 0.171 | -0.685            | 4.35×10 <sup>-05</sup> |
| 9                       | rs12376595 | intergenic   | 7685789               | C       | 0.179 | -0.749            | 0.181           | 0.039                           | 4.17×10 <sup>-05</sup> |                       |            |            |       |                   |                        |
| 12                      | rs10777820 | NEDD1        | 97300540              | A       | 0.487 | 0.620             | 0.150           | 0.039                           | 4.45×10 <sup>-05</sup> |                       |            |            |       |                   |                        |
| 3                       | rs815710   | intergenic   | 61262149              | A       | 0.323 | -0.591            | 0.144           | 0.039                           | 4.72×10 <sup>-05</sup> |                       |            |            |       |                   |                        |

Chr: Chromosome. SNP Single Nucleotide Polymorphism. <sup>1</sup>: Model 1, unadjusted general linear model (GLM). SNPs were tested in an additive model (0, 1, or 2 minor alleles). <sup>2</sup>: Model 2, GLM adjusted for sex, age and diabetes. MAF: Minor allele frequency. Beta: Indicates the regression coefficients per one minor allele in the corresponding model. SE: Standard error of Beta. R<sup>2</sup>: Determination coefficient. <sup>3</sup>: Base position in the chromosome (Homo Sapiens GRCh37.p13 genome build used in Illumina HumanOmniExpress-24 BeadChip).

**Supplemental Figure 7.** Manhattan plot for the GWAS results for the linoleic fatty acid (%) in the whole population. Associations were obtained from the genetic additive model and  $p$ -values were expressed as  $-\log_{10}(p\text{-value})$ . The red line represents the threshold for GWAS statistical significance ( $-\log_{10}(5 \times 10^{-8})$ ). The blue line represents the threshold for suggestive GWAS significance ( $-\log_{10}(1 \times 10^{-5})$ ).

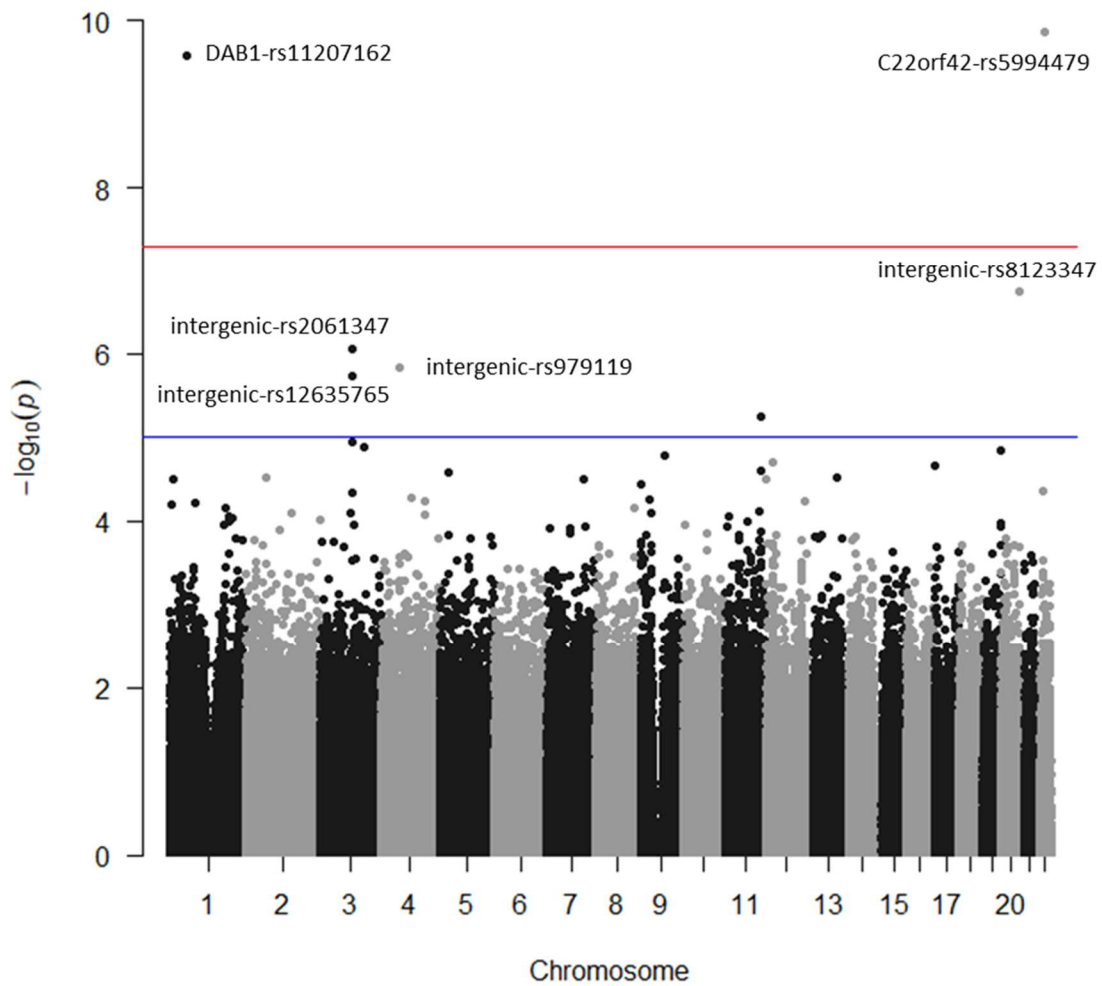

**Supplemental Figure 8.** Q-Q plot for the GWAS on linoleic fatty acid concentrations (%) in the whole population.

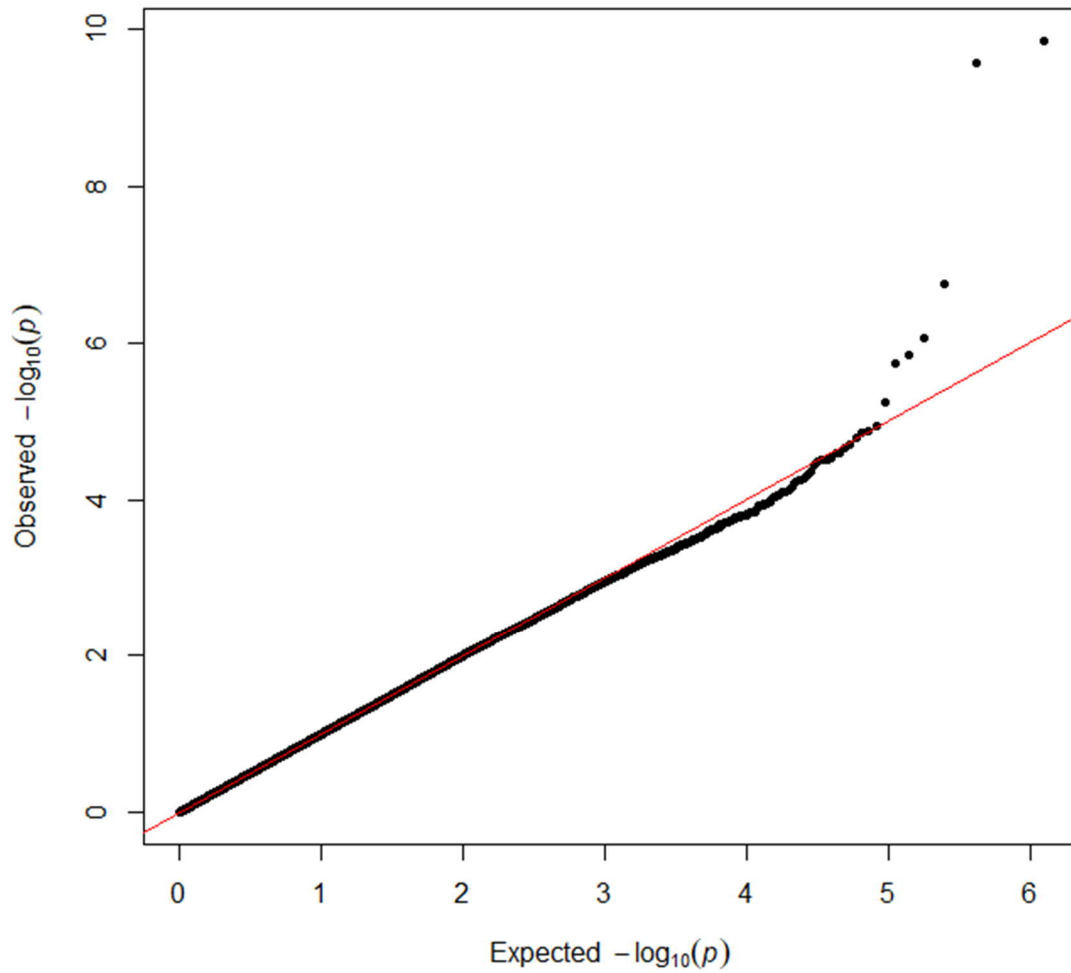

**Supplemental Table 5.** Top-ranked SNPs in the GWAS for linoleic fatty acid concentrations (%) in the whole population.

| Unadjusted <sup>1</sup> |            |            |                       |         |       |                   |                 |                   |                        | Adjusted <sup>2</sup> |            |            |       |                   |                        |
|-------------------------|------------|------------|-----------------------|---------|-------|-------------------|-----------------|-------------------|------------------------|-----------------------|------------|------------|-------|-------------------|------------------------|
| Chr                     | SNP        | Gene       | Position <sup>3</sup> | Alleles | MAF   | Beta <sup>1</sup> | SE <sup>1</sup> | R <sup>2(1)</sup> | P <sup>1</sup>         | Chr                   | SNP        | Gene       | MAF   | Beta <sup>2</sup> | P <sup>2</sup>         |
| 22                      | rs5994479  | C22orf42   | 32557939              | G       | 0.217 | -1.159            | 0.176           | 0.095             | 1.39×10 <sup>-10</sup> | 22                    | rs5994479  | C22orf42   | 0.217 | -1.131            | 5.25×10 <sup>-10</sup> |
| 1                       | rs11207162 | DAB1       | 58526758              | T       | 0.124 | 1.052             | 0.162           | 0.094             | 2.67×10 <sup>-10</sup> | 1                     | rs11207162 | DAB1       | 0.124 | 1.031             | 5.69×10 <sup>-10</sup> |
| 20                      | rs8123347  | intergenic | 59449366              | A       | 0.118 | -1.076            | 0.202           | 0.079             | 1.78×10 <sup>-07</sup> | 20                    | rs8123347  | intergenic | 0.118 | -1.059            | 2.84×10 <sup>-07</sup> |
| 3                       | rs2061347  | intergenic | 103492587             | A       | 0.169 | -1.147            | 0.230           | 0.056             | 8.60×10 <sup>-07</sup> | 3                     | rs2061347  | intergenic | 0.169 | -1.182            | 3.81×10 <sup>-07</sup> |
| 4                       | rs979119   | intergenic | 58671636              | A       | 0.082 | 1.675             | 0.343           | 0.054             | 1.46×10 <sup>-06</sup> | 3                     | rs12635765 | intergenic | 0.104 | -1.375            | 1.66×10 <sup>-06</sup> |
| 3                       | rs12635765 | intergenic | 103482015             | G       | 0.104 | -1.373            | 0.284           | 0.052             | 1.86×10 <sup>-06</sup> | 4                     | rs979119   | intergenic | 0.082 | 1.655             | 2.20×10 <sup>-06</sup> |
| 11                      | rs6589490  | CADM1      | 115131900             | G       | 0.350 | 0.733             | 0.159           | 0.048             | 5.72×10 <sup>-06</sup> | 11                    | rs6589490  | CADM1      | 0.350 | 0.741             | 4.52×10 <sup>-06</sup> |
| 3                       | rs16849343 | intergenic | 103504420             | C       | 0.306 | -0.859            | 0.194           | 0.044             | 1.15×10 <sup>-05</sup> | 3                     | rs16849343 | intergenic | 0.306 | -0.877            | 7.77×10 <sup>-06</sup> |
| 3                       | rs4839595  | SLC9A9     | 143163169             | G       | 0.427 | -0.724            | 0.164           | 0.044             | 1.32×10 <sup>-05</sup> | 1                     | rs6664362  | SLC25A33   | 0.025 | 1.441             | 1.15×10 <sup>-05</sup> |
| 19                      | rs12463137 | ZNF773     | 58011421              | T       | 0.261 | 0.934             | 0.213           | 0.044             | 1.42×10 <sup>-05</sup> | 9                     | rs273432   | intergenic | 0.281 | -0.826            | 1.30×10 <sup>-05</sup> |
| 9                       | rs273432   | intergenic | 81866882              | G       | 0.281 | -0.817            | 0.187           | 0.043             | 1.62×10 <sup>-05</sup> | 7                     | rs11982968 | intergenic | 0.121 | 1.194             | 1.46×10 <sup>-05</sup> |
| 12                      | rs2268861  | ST8SIA1    | 22389474              | A       | 0.373 | -0.756            | 0.175           | 0.042             | 1.95×10 <sup>-05</sup> | 5                     | rs1921111  | intergenic | 0.262 | 0.781             | 1.48×10 <sup>-05</sup> |
| 17                      | rs178567   | RAP1GAP2   | 2699322               | T       | 0.171 | 0.735             | 0.171           | 0.042             | 2.21×10 <sup>-05</sup> | 12                    | rs2268861  | ST8SIA1    | 0.373 | -0.761            | 1.61×10 <sup>-05</sup> |
| 11                      | rs7121254  | CADM1      | 115133557             | G       | 0.388 | 0.682             | 0.160           | 0.041             | 2.51×10 <sup>-05</sup> | 19                    | rs12463137 | ZNF773     | 0.261 | 0.920             | 1.91×10 <sup>-05</sup> |
| 5                       | rs1921111  | intergenic | 30870858              | A       | 0.262 | 0.757             | 0.178           | 0.041             | 2.59×10 <sup>-05</sup> | 3                     | rs4839595  | SLC9A9     | 0.427 | -0.711            | 1.97×10 <sup>-05</sup> |
| 13                      | rs7331021  | intergenic | 95061492              | C       | 0.342 | 0.836             | 0.198           | 0.040             | 3.02×10 <sup>-05</sup> | 2                     | rs6715876  | ACTR2      | 0.307 | 0.710             | 2.40×10 <sup>-05</sup> |
| 2                       | rs6715876  | ACTR2      | 65486928              | C       | 0.307 | 0.698             | 0.166           | 0.040             | 3.04×10 <sup>-05</sup> | 12                    | rs2270033  | WNT5B      | 0.324 | -0.764            | 2.61×10 <sup>-05</sup> |
| 7                       | rs11982968 | intergenic | 121323059             | G       | 0.121 | 1.149             | 0.273           | 0.040             | 3.14×10 <sup>-05</sup> | 9                     | rs1412254  | intergenic | 0.125 | -0.817            | 2.71×10 <sup>-05</sup> |
| 12                      | rs2270033  | WNT5B      | 1743296               | C       | 0.324 | -0.758            | 0.180           | 0.040             | 3.14×10 <sup>-05</sup> | 17                    | rs178567   | RAP1GAP2   | 0.171 | 0.725             | 3.03×10 <sup>-05</sup> |
| 1                       | rs6664362  | SLC25A33   | 9613871               | T       | 0.025 | 1.366             | 0.325           | 0.041             | 3.20×10 <sup>-05</sup> | 11                    | rs7938209  | SBF2       | 0.003 | 1.346             | 3.04×10 <sup>-05</sup> |
| 9                       | rs1412254  | intergenic | 1510230               | A       | 0.125 | -0.807            | 0.193           | 0.040             | 3.55×10 <sup>-05</sup> | 11                    | rs7121254  | CADM1      | 0.388 | 0.675             | 3.09×10 <sup>-05</sup> |
| 22                      | rs5996830  | KIAA1671   | 25465256              | C       | 0.195 | -0.871            | 0.211           | 0.039             | 4.30×10 <sup>-05</sup> | 9                     | rs34942735 | AQP3       | 0.001 | 1.375             | 3.60×10 <sup>-05</sup> |
| 3                       | rs16849322 | intergenic | 103485884             | A       | 0.101 | -1.163            | 0.282           | 0.039             | 4.55×10 <sup>-05</sup> | 3                     | rs16849322 | intergenic | 0.101 | -1.170            | 3.88×10 <sup>-05</sup> |
|                         |            |            |                       |         |       |                   |                 |                   |                        | 4                     | rs4699670  | intergenic | 0.350 | -0.734            | 4.22×10 <sup>-05</sup> |
|                         |            |            |                       |         |       |                   |                 |                   |                        | 8                     | rs2385167  | TBC1D31    | 0.077 | -1.530            | 4.87×10 <sup>-05</sup> |

Chr: Chromosome. SNP Single Nucleotide Polymorphism. <sup>1</sup>: Model 1, unadjusted general linear model (GLM). SNPs were tested in an additive model (0, 1, or 2 minor alleles). <sup>2</sup>: Model 2, GLM adjusted for sex, age and diabetes. MAF: Minor allele frequency. Beta: Indicates the regression coefficients per one minor allele. SE: Standard error of Beta. Beta<sup>1</sup>: indicates the regression coefficients for the unadjusted general linear model. Beta<sup>2</sup>: indicates the regression coefficients for the adjusted general linear model for sex, age and diabetes. R<sup>2</sup>: Determination coefficient. <sup>3</sup>: Base position in the chromosome (Homo Sapiens GRCh37.p13 genome build used in Illumina HumanOmniExpress-24 BeadChip) (P<5×10<sup>-5</sup>).

**Supplemental Figure 9.** Manhattan plot for the genome-wide interaction with adherence to Mediterranean diet in determining polyunsaturated fatty acid (%) in the whole population. Associations were obtained from the genetic additive model and  $p$ -values were expressed as  $-\log_{10}(p\text{-value})$ . The red line represents the threshold for GWAS statistical significance ( $-\log_{10}(5 \times 10^{-8})$ ). The blue line represents the threshold for suggestive GWAS significance ( $-\log_{10}(1 \times 10^{-5})$ ).

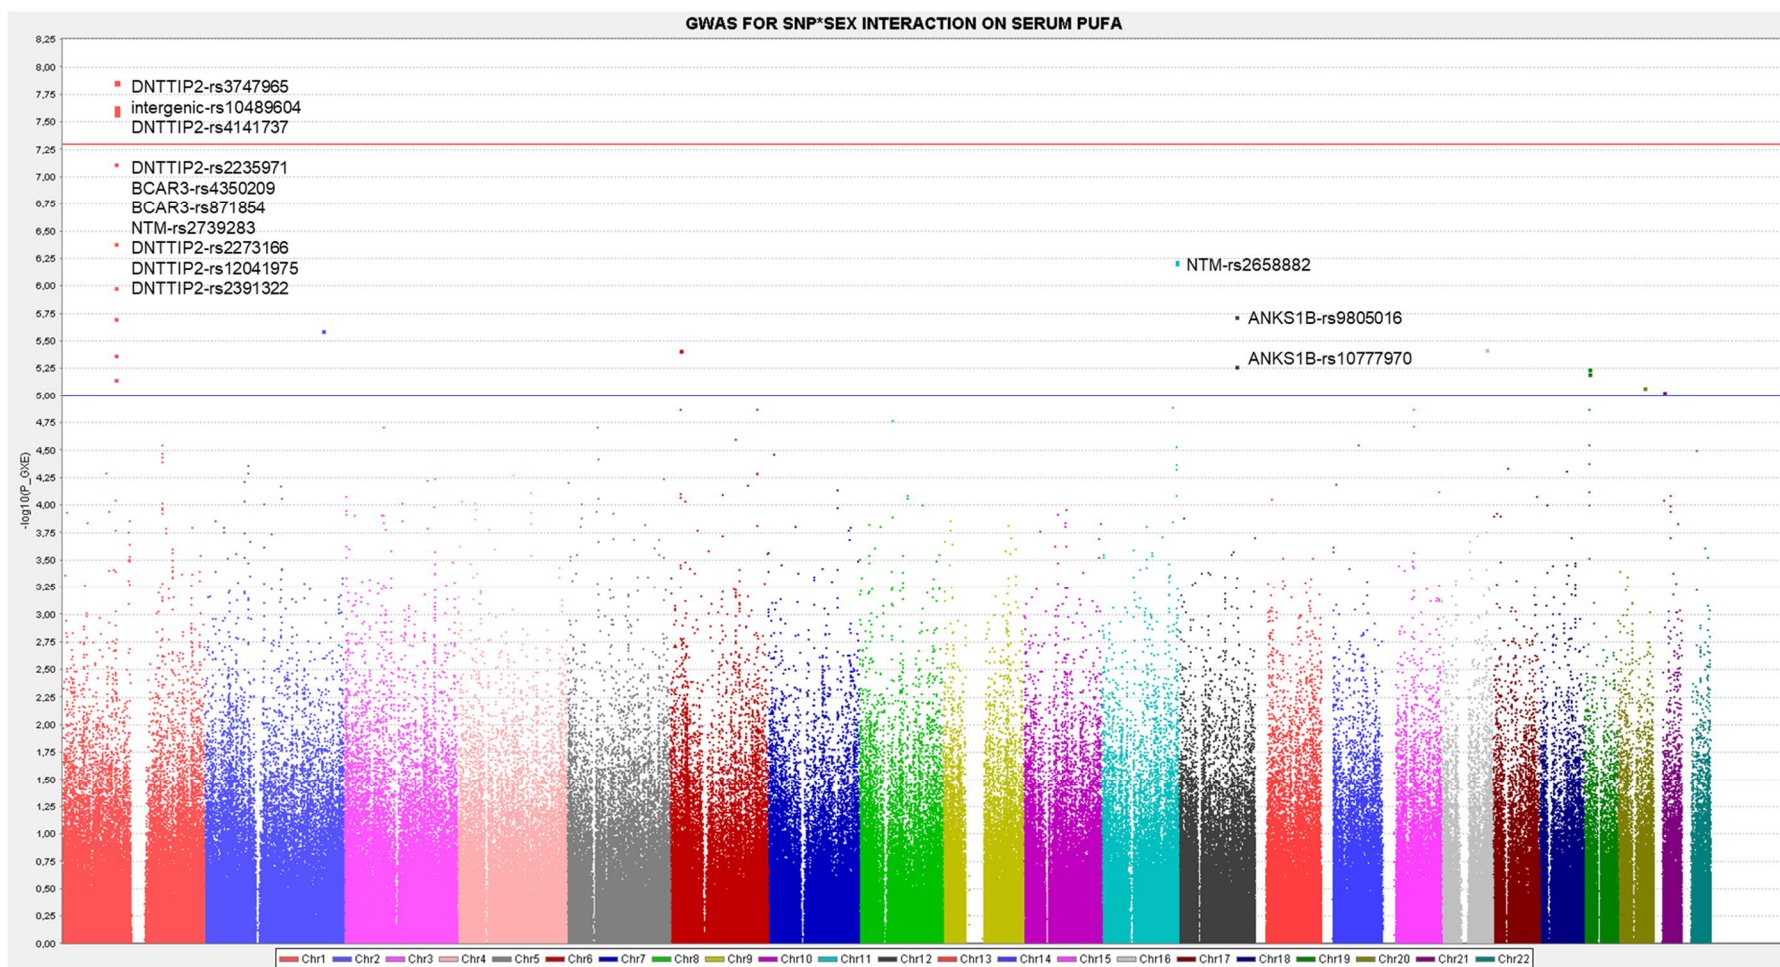

**Supplemental Table 6.** Top-ranked SNPs in the GWAS for the serum omega-6/omega-3 PUFA ratio in the whole population.

| Unadjusted <sup>1</sup> |            |            |                       |         |       |                   |                 |                   |                        | Adjusted <sup>2</sup> |            |            |       |                   |                        |
|-------------------------|------------|------------|-----------------------|---------|-------|-------------------|-----------------|-------------------|------------------------|-----------------------|------------|------------|-------|-------------------|------------------------|
| Chr                     | SNP        | Gene       | Position <sup>3</sup> | Alleles | MAF   | Beta <sup>1</sup> | SE <sup>1</sup> | R <sup>2(1)</sup> | P <sup>1</sup>         | Chr                   | SNP        | Gene       | MAF   | Beta <sup>2</sup> | P <sup>2</sup>         |
| 11                      | rs174547   | FADS1      | 61803311              | C       | 0.298 | 0.042             | 0.005           | 0.137             | 3.91×10 <sup>-15</sup> | 11                    | rs174547   | FADS1      | 0.298 | 0.041             | 2.19×10 <sup>-14</sup> |
| 11                      | rs174583   | FADS2      | 61842278              | T       | 0.369 | 0.040             | 0.005           | 0.136             | 4.69×10 <sup>-15</sup> | 11                    | rs174583   | FADS2      | 0.369 | 0.040             | 2.21×10 <sup>-14</sup> |
| 11                      | rs174550   | FADS1      | 61804006              | C       | 0.298 | 0.042             | 0.005           | 0.135             | 6.13×10 <sup>-15</sup> | 11                    | rs174550   | FADS1      | 0.298 | 0.041             | 3.49×10 <sup>-14</sup> |
| 11                      | rs174546   | FADS1      | 61802358              | T       | 0.298 | 0.042             | 0.005           | 0.134             | 6.83×10 <sup>-15</sup> | 11                    | rs1535     | FADS2      | 0.322 | 0.040             | 3.72×10 <sup>-14</sup> |
| 11                      | rs1535     | FADS2      | 61830500              | G       | 0.322 | 0.041             | 0.005           | 0.134             | 7.97×10 <sup>-15</sup> | 11                    | rs174546   | FADS1      | 0.298 | 0.041             | 3.90×10 <sup>-14</sup> |
| 11                      | rs174576   | FADS2      | 61836038              | A       | 0.363 | 0.040             | 0.005           | 0.134             | 8.21×10 <sup>-15</sup> | 11                    | rs174576   | FADS2      | 0.363 | 0.039             | 4.13×10 <sup>-14</sup> |
| 11                      | rs174535   | MYRF       | 61783884              | C       | 0.340 | 0.040             | 0.005           | 0.126             | 4.99×10 <sup>-14</sup> | 11                    | rs174577   | FADS2      | 0.392 | 0.038             | 2.31×10 <sup>-13</sup> |
| 11                      | rs174577   | FADS2      | 61837342              | A       | 0.392 | 0.039             | 0.005           | 0.126             | 5.05×10 <sup>-14</sup> | 11                    | rs174535   | MYRF       | 0.340 | 0.039             | 2.46×10 <sup>-13</sup> |
| 11                      | rs102275   | TMEM258    | 61790331              | C       | 0.493 | 0.039             | 0.005           | 0.123             | 1.12×10 <sup>-13</sup> | 11                    | rs102275   | TMEM258    | 0.493 | 0.038             | 4.43×10 <sup>-13</sup> |
| 11                      | rs174538   | FEN1       | 61792609              | A       | 0.282 | 0.039             | 0.005           | 0.110             | 2.69×10 <sup>-12</sup> | 11                    | rs174538   | FEN1       | 0.282 | 0.038             | 1.41×10 <sup>-11</sup> |
| 11                      | rs108499   | MYRF       | 61779765              | T       | 0.288 | 0.038             | 0.005           | 0.105             | 7.31×10 <sup>-12</sup> | 11                    | rs108499   | MYRF       | 0.288 | 0.037             | 3.07×10 <sup>-11</sup> |
| 11                      | rs174532   | MYRF       | 61781402              | A       | 0.100 | -0.029            | 0.005           | 0.069             | 3.75×10 <sup>-08</sup> | 11                    | rs174532   | MYRF       | 0.100 | -0.029            | 4.75×10 <sup>-08</sup> |
| 11                      | rs2727270  | FADS2      | 61835765              | T       | 0.163 | 0.043             | 0.009           | 0.056             | 7.67×10 <sup>-07</sup> | 13                    | rs2390277  | —          | 0.359 | -0.026            | 3.89×10 <sup>-07</sup> |
| 3                       | rs7611558  | intergenic | 30093002              | T       | 0.380 | -0.025            | 0.005           | 0.057             | 7.87×10 <sup>-07</sup> | 3                     | rs7611558  | —          | 0.380 | -0.024            | 1.65×10 <sup>-06</sup> |
| 13                      | rs2390277  | intergenic | 99406265              | A       | 0.359 | -0.025            | 0.005           | 0.054             | 1.27×10 <sup>-06</sup> | 11                    | rs2727270  | FADS2      | 0.163 | 0.042             | 1.83×10 <sup>-06</sup> |
| 3                       | rs4426643  | intergenic | 30094871              | G       | 0.420 | -0.024            | 0.005           | 0.054             | 1.51×10 <sup>-06</sup> | 3                     | rs11715853 | —          | 0.317 | -0.025            | 2.10×10 <sup>-06</sup> |
| 3                       | rs11715853 | intergenic | 30122198              | G       | 0.317 | -0.025            | 0.005           | 0.053             | 1.57×10 <sup>-06</sup> | 3                     | rs4426643  | —          | 0.420 | -0.023            | 3.17×10 <sup>-06</sup> |
| 10                      | rs2207778  | NRG3       | 82013458              | A       | 0.113 | -0.034            | 0.007           | 0.050             | 3.98×10 <sup>-06</sup> | 4                     | rs2736982  | DSPP       | 0.326 | -0.024            | 4.26×10 <sup>-06</sup> |
| 8                       | rs7812327  | ASPH       | 61641853              | T       | 0.333 | -0.027            | 0.006           | 0.047             | 6.81×10 <sup>-06</sup> | 20                    | rs11908058 | CFAP61     | 0.288 | -0.025            | 6.23×10 <sup>-06</sup> |
| 20                      | rs11908058 | CFAP61     | 20340192              | A       | 0.288 | -0.025            | 0.006           | 0.046             | 8.30×10 <sup>-06</sup> | 10                    | rs2207778  | NRG3       | 0.113 | -0.033            | 7.44×10 <sup>-06</sup> |
| 10                      | rs10884061 | NRG3       | 82030465              | A       | 0.245 | -0.031            | 0.007           | 0.046             | 8.77×10 <sup>-06</sup> | 1                     | rs7528478  | LOC1079854 | 0.471 | 0.023             | 8.04×10 <sup>-06</sup> |

12

Chr: Chromosome. SNP Single Nucleotide Polymorphism. <sup>1</sup>: Model 1, unadjusted general linear model (GLM). SNPs were tested in an additive model (0, 1, or 2 minor alleles). <sup>2</sup>: Model 2, GLM adjusted for sex, age and diabetes. MAF: Minor allele frequency. Beta: Indicates the regression coefficients per one minor allele. SE: Standard error of Beta. Beta<sup>1</sup>: indicates the regression coefficients for the unadjusted general linear model. Beta<sup>2</sup>: indicates the regression coefficients for the adjusted general linear model for sex, age and diabetes. R<sup>2</sup>: Determination coefficient. <sup>3</sup>: Base position in the chromosome (Homo Sapiens GRCh37.p13 genome build used in Illumina HumanOmniExpress-24 BeadChip) (P<5×10<sup>-5</sup>).



**Supplemental Table 7.** SNPs in the RWAS for the FADS1/FADS2/FADS3 region in determining serum omega-3 fatty acid concentrations (%) in the whole population.

| Adjusted <sup>1</sup> |            |       |                       |         |       |        |                        |
|-----------------------|------------|-------|-----------------------|---------|-------|--------|------------------------|
| Chr                   | SNP        | Gene  | Position <sup>2</sup> | Alleles | MAF   | Beta   | p                      |
| 11                    | rs174547   | FADS1 | 61570783              | C       | 0.298 | -0.369 | 1.44x10 <sup>-14</sup> |
| 11                    | rs174550   | FADS1 | 61571478              | C       | 0.298 | -0.367 | 2.26x10 <sup>-14</sup> |
| 11                    | rs1535     | FADS2 | 61597972              | G       | 0.322 | -0.359 | 2.55x10 <sup>-14</sup> |
| 11                    | rs174546   | FADS1 | 61569830              | T       | 0.298 | -0.365 | 2.81x10 <sup>-14</sup> |
| 11                    | rs174583   | FADS2 | 61609750              | T       | 0.369 | -0.349 | 4.26x10 <sup>-14</sup> |
| 11                    | rs174576   | FADS2 | 61603510              | A       | 0.363 | -0.350 | 5.00x10 <sup>-14</sup> |
| 11                    | rs174577   | FADS2 | 61604814              | A       | 0.392 | -0.336 | 4.80x10 <sup>-13</sup> |
| 11                    | rs2727270  | FADS2 | 61603237              | T       | 0.163 | -0.400 | 3.84x10 <sup>-07</sup> |
| 11                    | rs174570   | FADS2 | 61597212              | T       | 0.228 | -0.295 | 2.20x10 <sup>-05</sup> |
| 11                    | rs2851682  | FADS2 | 61616012              | G       | 0.149 | -0.339 | 1.18x10 <sup>-04</sup> |
| 11                    | rs174611   | FADS2 | 61627881              | C       | 0.116 | -0.175 | 1.35x10 <sup>-03</sup> |
| 11                    | rs174618   | FADS2 | 61629322              | C       | 0.349 | -0.136 | 4.38x10 <sup>-03</sup> |
| 11                    | rs174450   | FADS3 | 61641542              | T       | 0.435 | -0.122 | 1.15x10 <sup>-02</sup> |
| 11                    | rs174455   | FADS3 | 61656117              | A       | 0.407 | -0.107 | 2.65x10 <sup>-02</sup> |
| 11                    | rs17156442 | FADS2 | 61614023              | T       | 0.098 | -0.216 | 3.68x10 <sup>-02</sup> |
| 11                    | rs12807005 | FADS2 | 61591059              | A       | 0.006 | 0.383  | 6.28x10 <sup>-02</sup> |
| 11                    | rs1000778  | FADS3 | 61655305              | A       | 0.477 | -0.080 | 1.17x10 <sup>-01</sup> |
| 11                    | rs7942717  | FADS3 | 61647288              | G       | 0.097 | -0.080 | 2.99x10 <sup>-01</sup> |
| 11                    | rs498793   | FADS2 | 61624705              | T       | 0.313 | 0.036  | 4.51x10 <sup>-01</sup> |
| 11                    | rs17764288 | FADS2 | 61633736              | A       | 0.003 | -0.146 | 4.99x10 <sup>-01</sup> |
| 11                    | rs482548   | FADS2 | 61633182              | T       | 0.030 | -0.010 | 8.89x10 <sup>-01</sup> |

RWAS: Region-wide association study. The region in chromosome 11 containing the FADS1, FADS2 and FADS3 genes was analyzed. Chr: Chromosome. SNP Single Nucleotide Polymorphism. <sup>1</sup>: General linear model (GLM) adjusted for sex, age and diabetes: SNPs were tested in an additive model (0, 1, or 2 minor alleles). Beta: Indicates the regression coefficients per one minor allele. MAF: Minor allele frequency. <sup>2</sup>: Base position in the chromosome (Homo Sapiens GRCh37.p13 genome build used in Illumina HumanOmniExpress-24 BeadChip).

**Supplemental Table 8.** SNPs in the RWAS for the FADS1/FADS2/FADS3 region in determining serum docosahexaenoic fatty acid concentrations (%) in the whole population.

| Adjusted <sup>1</sup> |            |       |                       |         |       |        |                        |
|-----------------------|------------|-------|-----------------------|---------|-------|--------|------------------------|
| Chr                   | SNP        | Gene  | Position <sup>2</sup> | Alleles | MAF   | Beta   | p                      |
| 11                    | rs174547   | FADS1 | 61570783              | C       | 0.298 | -0.122 | 6.38x10 <sup>-12</sup> |
| 11                    | rs174550   | FADS1 | 61571478              | C       | 0.298 | -0.122 | 7.44x10 <sup>-12</sup> |
| 11                    | rs174546   | FADS1 | 61569830              | T       | 0.298 | -0.122 | 8.22x10 <sup>-12</sup> |
| 11                    | rs1535     | FADS2 | 61597972              | G       | 0.322 | -0.118 | 1.46x10 <sup>-11</sup> |
| 11                    | rs174583   | FADS2 | 61609750              | T       | 0.369 | -0.115 | 1.72x10 <sup>-11</sup> |
| 11                    | rs174576   | FADS2 | 61603510              | A       | 0.363 | -0.115 | 2.24x10 <sup>-11</sup> |
| 11                    | rs174577   | FADS2 | 61604814              | A       | 0.392 | -0.110 | 1.79x10 <sup>-10</sup> |
| 11                    | rs2727270  | FADS2 | 61603237              | T       | 0.163 | -0.126 | 1.49x10 <sup>-05</sup> |
| 11                    | rs174570   | FADS2 | 61597212              | T       | 0.228 | -0.103 | 5.97x10 <sup>-05</sup> |
| 11                    | rs2851682  | FADS2 | 61616012              | G       | 0.149 | -0.111 | 6.03x10 <sup>-04</sup> |
| 11                    | rs174611   | FADS2 | 61627881              | C       | 0.116 | -0.060 | 2.80x10 <sup>-03</sup> |
| 11                    | rs174618   | FADS2 | 61629322              | C       | 0.349 | -0.039 | 2.50x10 <sup>-02</sup> |
| 11                    | rs174450   | FADS3 | 61641542              | T       | 0.435 | -0.034 | 5.20x10 <sup>-02</sup> |
| 11                    | rs174455   | FADS3 | 61656117              | A       | 0.407 | -0.031 | 7.52x10 <sup>-02</sup> |
| 11                    | rs12807005 | FADS2 | 61591059              | A       | 0.006 | 0.122  | 1.07x10 <sup>-01</sup> |
| 11                    | rs17156442 | FADS2 | 61614023              | T       | 0.098 | -0.052 | 1.69x10 <sup>-01</sup> |
| 11                    | rs498793   | FADS2 | 61624705              | T       | 0.313 | 0.020  | 2.48x10 <sup>-01</sup> |
| 11                    | rs1000778  | FADS3 | 61655305              | A       | 0.477 | -0.019 | 3.20x10 <sup>-01</sup> |
| 11                    | rs7942717  | FADS3 | 61647288              | G       | 0.097 | -0.014 | 6.32x10 <sup>-01</sup> |
| 11                    | rs17764288 | FADS2 | 61633736              | A       | 0.003 | -0.032 | 6.86x10 <sup>-01</sup> |
| 11                    | rs482548   | FADS2 | 61633182              | T       | 0.030 | 0.000  | 9.97x10 <sup>-01</sup> |

RWAS: Region-wide association study. The region in chromosome 11 containing the FADS1, FADS2 and FADS3 genes was analyzed. Chr: Chromosome. SNP Single Nucleotide Polymorphism. <sup>1</sup>: General linear model (GLM) adjusted for sex, age and diabetes: SNPs were tested in an additive model (0, 1, or 2 minor alleles). Beta: Indicates the regression coefficients per one minor allele for the adjusted general linear model for sex and age. MAF: Minor allele frequency. <sup>2</sup>: Base position in the chromosome (Homo Sapiens GRCh37.p13 genome build used in Illumina HumanOmniExpress-24 BeadChip).

**Supplemental Table 9.** SNPs in the RWAS for the FADS1/FADS2/FADS3 region in determining serum omega-6 fatty acid concentrations (%) in the whole population.

| Adjusted <sup>1</sup> |            |       |                       |         |       |        |                        |
|-----------------------|------------|-------|-----------------------|---------|-------|--------|------------------------|
| Chr                   | SNP        | Gene  | Position <sup>2</sup> | Alleles | MAF   | Beta   | p                      |
| 11                    | rs174618   | FADS2 | 61629322              | C       | 0.349 | 0.314  | 3.71x10 <sup>-02</sup> |
| 11                    | rs174611   | FADS2 | 61627881              | C       | 0.116 | 0.342  | 4.70x10 <sup>-02</sup> |
| 11                    | rs17156442 | FADS2 | 61614023              | T       | 0.098 | 0.576  | 7.75x10 <sup>-02</sup> |
| 11                    | rs174450   | FADS3 | 61641542              | T       | 0.435 | 0.217  | 1.55x10 <sup>-01</sup> |
| 11                    | rs174455   | FADS3 | 61656117              | A       | 0.407 | 0.180  | 2.36x10 <sup>-01</sup> |
| 11                    | rs174570   | FADS2 | 61597212              | T       | 0.228 | -0.211 | 3.43x10 <sup>-01</sup> |
| 11                    | rs2851682  | FADS2 | 61616012              | G       | 0.149 | 0.589  | 3.67x10 <sup>-01</sup> |
| 11                    | rs2727270  | FADS2 | 61603237              | T       | 0.163 | -0.235 | 4.02x10 <sup>-01</sup> |
| 11                    | rs12807005 | FADS2 | 61591059              | A       | 0.006 | -0.208 | 4.10x10 <sup>-01</sup> |
| 11                    | rs1000778  | FADS3 | 61655305              | A       | 0.477 | 0.121  | 4.52x10 <sup>-01</sup> |
| 11                    | rs174583   | FADS2 | 61609750              | T       | 0.369 | 0.086  | 5.71x10 <sup>-01</sup> |
| 11                    | rs174577   | FADS2 | 61604814              | A       | 0.392 | 0.119  | 6.12x10 <sup>-01</sup> |
| 11                    | rs174576   | FADS2 | 61603510              | A       | 0.363 | 0.074  | 6.26x10 <sup>-01</sup> |
| 11                    | rs482548   | FADS2 | 61633182              | T       | 0.030 | 0.063  | 6.78x10 <sup>-01</sup> |
| 11                    | rs1535     | FADS2 | 61597972              | G       | 0.322 | 0.033  | 8.28x10 <sup>-01</sup> |
| 11                    | rs174546   | FADS1 | 61569830              | T       | 0.298 | -0.136 | 8.42x10 <sup>-01</sup> |
| 11                    | rs174550   | FADS1 | 61571478              | C       | 0.298 | 0.028  | 8.60x10 <sup>-01</sup> |
| 11                    | rs174547   | FADS1 | 61570783              | C       | 0.298 | 0.026  | 8.65x10 <sup>-01</sup> |
| 11                    | rs498793   | FADS2 | 61624705              | T       | 0.313 | 0.026  | 8.71x10 <sup>-01</sup> |
| 11                    | rs17764288 | FADS2 | 61633736              | A       | 0.003 | 0.024  | 8.77x10 <sup>-01</sup> |
| 11                    | rs7942717  | FADS3 | 61647288              | G       | 0.097 | -0.002 | 9.92x10 <sup>-01</sup> |

RWAS: Region-wide association study. The region in chromosome 11 containing the FADS1, FADS2 and FADS3 genes was analyzed. Chr: Chromosome. SNP Single Nucleotide Polymorphism. <sup>1</sup>: General linear model (GLM) adjusted for sex, age and diabetes: SNPs were tested in an additive model (0, 1, or 2 minor alleles). Beta: Indicates the regression coefficients per one minor allele. MAF: Minor allele frequency. <sup>2</sup>: Base position in the chromosome (Homo Sapiens GRCh37.p13 genome build used in Illumina HumanOmniExpress-24 BeadChip).

**Supplemental Table 10.** SNPs in the RWAS for the ELOV2/ELOV5 region in determining serum omega-3 fatty acid concentrations (%) in the whole population.

| Adjusted <sup>1</sup> |            |        |                       |         |       |        |                |
|-----------------------|------------|--------|-----------------------|---------|-------|--------|----------------|
| Chr                   | SNP        | Gene   | Position <sup>2</sup> | Alleles | MAF   | Beta   | p <sup>3</sup> |
| 6                     | rs3756963  | ELOVL2 | 11022154              | C       | 0.258 | -0.078 | 0.164          |
| 6                     | rs1225737  | ELOVL2 | 10982652              | C       | 0.281 | -0.065 | 0.178          |
| 6                     | rs2295602  | ELOVL2 | 11005842              | T       | 0.317 | -0.064 | 0.185          |
| 6                     | rs12195587 | ELOVL2 | 10989942              | A       | 0.054 | 0.083  | 0.226          |
| 6                     | rs8523     | ELOVL2 | 10981053              | G       | 0.327 | -0.055 | 0.250          |
| 6                     | rs3734398  | ELOVL2 | 10982973              | T       | 0.448 | -0.054 | 0.262          |
| 6                     | rs17675073 | ELOVL2 | 11008649              | A       | 0.054 | 0.077  | 0.264          |
| 6                     | rs2281591  | ELOVL2 | 10990493              | G       | 0.326 | -0.059 | 0.288          |
| 6                     | rs16870906 | ELOVL2 | 11043039              | T       | 0.087 | -0.176 | 0.323          |
| 6                     | rs17606561 | ELOVL2 | 10982359              | A       | 0.182 | -0.053 | 0.356          |
| 6                     | rs16870891 | ELOVL2 | 11017481              | T       | 0.098 | 0.139  | 0.360          |
| 6                     | rs209512   | ELOVL5 | 53203577              | C       | 0.199 | 0.063  | 0.362          |
| 6                     | rs3798709  | ELOVL2 | 11001276              | G       | 0.252 | -0.042 | 0.507          |
| 6                     | rs911196   | ELOVL2 | 10990751              | G       | 0.252 | -0.038 | 0.543          |
| 6                     | rs209510   | ELOVL5 | 53202035              | C       | 0.388 | -0.028 | 0.547          |
| 6                     | rs3734397  | ELOVL2 | 10982848              | G       | 0.110 | -0.028 | 0.594          |
| 6                     | rs13204015 | ELOVL2 | 11040460              | C       | 0.014 | -0.054 | 0.598          |
| 6                     | rs7755145  | ELOVL2 | 10995180              | T       | 0.058 | 0.107  | 0.637          |
| 6                     | rs976081   | ELOVL2 | 11003875              | G       | 0.110 | -0.023 | 0.669          |
| 6                     | rs1150555  | ELOVL2 | 11000517              | C       | 0.025 | -0.062 | 0.688          |
| 6                     | rs2281274  | ELOVL5 | 53143554              | C       | 0.304 | -0.018 | 0.729          |
| 6                     | rs209515   | ELOVL5 | 53205947              | A       | 0.491 | 0.012  | 0.794          |
| 6                     | rs209521   | ELOVL5 | 53210355              | T       | 0.077 | 0.017  | 0.813          |
| 6                     | rs209511   | ELOVL5 | 53203007              | G       | 0.104 | 0.015  | 0.833          |
| 6                     | rs2235722  | ELOVL5 | 53138912              | C       | 0.189 | 0.011  | 0.841          |
| 6                     | rs9468304  | ELOVL2 | 11042165              | A       | 0.302 | 0.011  | 0.869          |
| 6                     | rs974323   | ELOVL5 | 53159547              | T       | 0.378 | 0.007  | 0.880          |
| 6                     | rs9370194  | ELOVL5 | 53175682              | T       | 0.404 | 0.005  | 0.918          |
| 6                     | rs761179   | ELOVL5 | 53166836              | C       | 0.403 | 0.002  | 0.975          |
| 6                     | rs4562128  | ELOVL5 | 53202606              | C       | 0.405 | 0.000  | 0.999          |
| 6                     | rs209512   | ELOVL5 | 53203577              | C       | 0.199 | 0.063  | 0.362          |

RWAS: Region-wide association study. The region in chromosome 6 containing the ELOV2 and ELOV5 genes was analyzed. Chr: Chromosome. SNP Single Nucleotide Polymorphism. <sup>1</sup>: Model 2, general linear model (GLM) adjusted for sex, age and diabetes: SNPs were tested in an additive model (0, 1, or 2 minor alleles). Beta: Indicates the regression coefficients per one minor allele. MAF: Minor allele frequency. <sup>2</sup>: Base position in the chromosome (Homo Sapiens GRCh37.p13 genome build used in Illumina HumanOmniExpress-24 BeadChip).

**Supplemental Table 11.** SNPs in the RWAS for the ELOV2/ELOV5 region in determining serum omega-6 fatty acid concentrations (%) in the whole population.

| Adjusted <sup>1</sup> |            |        |                       |         |       |        |       |
|-----------------------|------------|--------|-----------------------|---------|-------|--------|-------|
| Chr                   | SNP        | Gene   | Position <sup>2</sup> | Alleles | MAF   | Beta   | p     |
| 6                     | rs2295602  | ELOVL2 | 11005842              | T       | 0.317 | 0.353  | 0.021 |
| 6                     | rs8523     | ELOVL2 | 10981053              | G       | 0.327 | 0.345  | 0.023 |
| 6                     | rs3734398  | ELOVL2 | 10982973              | T       | 0.448 | 0.341  | 0.025 |
| 6                     | rs3734397  | ELOVL2 | 10982848              | G       | 0.110 | -0.318 | 0.058 |
| 6                     | rs1225737  | ELOVL2 | 10982652              | C       | 0.281 | 0.286  | 0.061 |
| 6                     | rs3798709  | ELOVL2 | 11001276              | G       | 0.252 | 0.334  | 0.093 |
| 6                     | rs911196   | ELOVL2 | 10990751              | G       | 0.252 | 0.320  | 0.107 |
| 6                     | rs976081   | ELOVL2 | 11003875              | G       | 0.110 | -0.268 | 0.114 |
| 6                     | rs9468304  | ELOVL2 | 11042165              | A       | 0.302 | 0.321  | 0.123 |
| 6                     | rs3756963  | ELOVL2 | 11022154              | C       | 0.258 | 0.203  | 0.249 |
| 6                     | rs2281591  | ELOVL2 | 10990493              | G       | 0.326 | 0.198  | 0.262 |
| 6                     | rs17606561 | ELOVL2 | 10982359              | A       | 0.182 | 0.184  | 0.310 |
| 6                     | rs2235722  | ELOVL5 | 53138912              | C       | 0.189 | -0.152 | 0.369 |
| 6                     | rs1150555  | ELOVL2 | 11000517              | C       | 0.025 | -0.354 | 0.469 |
| 6                     | rs13204015 | ELOVL2 | 11040460              | C       | 0.014 | -0.202 | 0.532 |
| 6                     | rs16870906 | ELOVL2 | 11043039              | T       | 0.087 | -0.344 | 0.541 |
| 6                     | rs209512   | ELOVL5 | 53203577              | C       | 0.199 | 0.127  | 0.558 |
| 6                     | rs17675073 | ELOVL2 | 11008649              | A       | 0.054 | -0.121 | 0.579 |
| 6                     | rs209511   | ELOVL5 | 53203007              | G       | 0.104 | 0.123  | 0.597 |
| 6                     | rs12195587 | ELOVL2 | 10989942              | A       | 0.054 | -0.108 | 0.621 |
| 6                     | rs4562128  | ELOVL5 | 53202606              | C       | 0.405 | -0.039 | 0.802 |
| 6                     | rs9370194  | ELOVL5 | 53175682              | T       | 0.404 | -0.032 | 0.837 |
| 6                     | rs209521   | ELOVL5 | 53210355              | T       | 0.077 | 0.046  | 0.842 |
| 6                     | rs2281274  | ELOVL5 | 53143554              | C       | 0.304 | -0.032 | 0.843 |
| 6                     | rs209510   | ELOVL5 | 53202035              | C       | 0.388 | 0.029  | 0.845 |
| 6                     | rs7755145  | ELOVL2 | 10995180              | T       | 0.058 | 0.114  | 0.874 |
| 6                     | rs209515   | ELOVL5 | 53205947              | A       | 0.491 | -0.019 | 0.900 |
| 6                     | rs16870891 | ELOVL2 | 11017481              | T       | 0.098 | 0.052  | 0.914 |
| 6                     | rs974323   | ELOVL5 | 53159547              | T       | 0.378 | -0.016 | 0.920 |
| 6                     | rs761179   | ELOVL5 | 53166836              | C       | 0.403 | -0.012 | 0.937 |

RWAS: Region-wide association study. The region in chromosome 6 containing the ELOV2 and ELOV5 genes was analyzed. Chr: Chromosome. SNP Single Nucleotide Polymorphism. <sup>1</sup>: General linear model (GLM) adjusted for sex, age and diabetes: SNPs were tested in an additive model (0, 1, or 2 minor alleles). Beta: Indicates the regression coefficients per one minor allele. MAF: Minor allele frequency. <sup>2</sup>: Base position in the chromosome (Homo Sapiens GRCh37.p13 genome build used in Illumina HumanOmniExpress-24 BeadChip).

**Supplemental Table 12.** SNPs in the RWAS for the ELOV2/ELOV5 region in determining linoleic fatty acid concentrations (%) in the whole population.

| Adjusted <sup>1</sup> |            |        |                       |         |       |        |       |
|-----------------------|------------|--------|-----------------------|---------|-------|--------|-------|
| Chr                   | SNP        | Gene   | Position <sup>2</sup> | Alleles | MAF   | Beta   | p     |
| 6                     | rs8523     | ELOVL2 | 10981053              | G       | 0.327 | 0.390  | 0.024 |
| 6                     | rs2295602  | ELOVL2 | 11005842              | T       | 0.317 | 0.390  | 0.024 |
| 6                     | rs3734398  | ELOVL2 | 10982973              | T       | 0.448 | 0.381  | 0.026 |
| 6                     | rs1225737  | ELOVL2 | 10982652              | C       | 0.281 | 0.368  | 0.032 |
| 6                     | rs3798709  | ELOVL2 | 11001276              | G       | 0.252 | 0.428  | 0.057 |
| 6                     | rs911196   | ELOVL2 | 10990751              | G       | 0.252 | 0.404  | 0.072 |
| 6                     | rs3734397  | ELOVL2 | 10982848              | G       | 0.110 | -0.293 | 0.122 |
| 6                     | rs9468304  | ELOVL2 | 11042165              | A       | 0.302 | 0.355  | 0.132 |
| 6                     | rs2235722  | ELOVL5 | 53138912              | C       | 0.189 | -0.262 | 0.170 |
| 6                     | rs17675073 | ELOVL2 | 11008649              | A       | 0.054 | -0.326 | 0.187 |
| 6                     | rs976081   | ELOVL2 | 11003875              | G       | 0.110 | -0.237 | 0.217 |
| 6                     | rs12195587 | ELOVL2 | 10989942              | A       | 0.054 | -0.298 | 0.227 |
| 6                     | rs2281274  | ELOVL5 | 53143554              | C       | 0.304 | 0.191  | 0.294 |
| 6                     | rs13204015 | ELOVL2 | 11040460              | C       | 0.014 | -0.341 | 0.351 |
| 6                     | rs2281591  | ELOVL2 | 10990493              | G       | 0.326 | 0.174  | 0.384 |
| 6                     | rs3756963  | ELOVL2 | 11022154              | C       | 0.258 | 0.168  | 0.398 |
| 6                     | rs16870891 | ELOVL2 | 11017481              | T       | 0.098 | 0.435  | 0.420 |
| 6                     | rs17606561 | ELOVL2 | 10982359              | A       | 0.182 | 0.143  | 0.485 |
| 6                     | rs209511   | ELOVL5 | 53203007              | G       | 0.104 | 0.175  | 0.505 |
| 6                     | rs4562128  | ELOVL5 | 53202606              | C       | 0.405 | -0.112 | 0.527 |
| 6                     | rs9370194  | ELOVL5 | 53175682              | T       | 0.404 | -0.088 | 0.613 |
| 6                     | rs209521   | ELOVL5 | 53210355              | T       | 0.077 | 0.120  | 0.649 |
| 6                     | rs974323   | ELOVL5 | 53159547              | T       | 0.378 | -0.074 | 0.673 |
| 6                     | rs761179   | ELOVL5 | 53166836              | C       | 0.403 | -0.069 | 0.694 |
| 6                     | rs7755145  | ELOVL2 | 10995180              | T       | 0.058 | 0.318  | 0.695 |
| 6                     | rs209515   | ELOVL5 | 53205947              | A       | 0.491 | -0.061 | 0.716 |
| 6                     | rs16870906 | ELOVL2 | 11043039              | T       | 0.087 | 0.190  | 0.765 |
| 6                     | rs209510   | ELOVL5 | 53202035              | C       | 0.388 | 0.030  | 0.856 |
| 6                     | rs209512   | ELOVL5 | 53203577              | C       | 0.199 | -0.032 | 0.898 |
| 6                     | rs1150555  | ELOVL2 | 11000517              | C       | 0.025 | 0.042  | 0.940 |

RWAS: Region-wide association study. The region in chromosome 6 containing the ELOV2 and ELOV5 genes was analyzed. Chr: Chromosome. SNP Single Nucleotide Polymorphism. <sup>1</sup>: Model 2, general linear model (GLM) adjusted for sex, age and diabetes: SNPs were tested in an additive model (0, 1, or 2 minor alleles). Beta: Indicates the regression coefficients per one minor allele. MAF: Minor allele frequency. <sup>2</sup>: Base position in the chromosome (Homo Sapiens GRCh37.p13 genome build used in Illumina HumanOmniExpress-24 BeadChip).

**Supplemental Figure 10.** Serum omega-6/omega-3 PUFA ratio depending on the FADS1-rs174547 genotype in the whole population. Genotype prevalence was: TT 49.3% (n=212), TC 41.0% (n=172) and CC 9.7% (n=42). The minor allele (C) was associated with higher concentrations in all the adjusted models. 1: Unadjusted model; 2: Model adjusted for sex, age and diabetes; 3: Model adjusted for sex, age, diabetes, body mass index, medications (antihypertensive, hypolipidemic and antidiabetic drugs), smoking, physical activity and adherence to Mediterranean diet. Values are means by genotype.

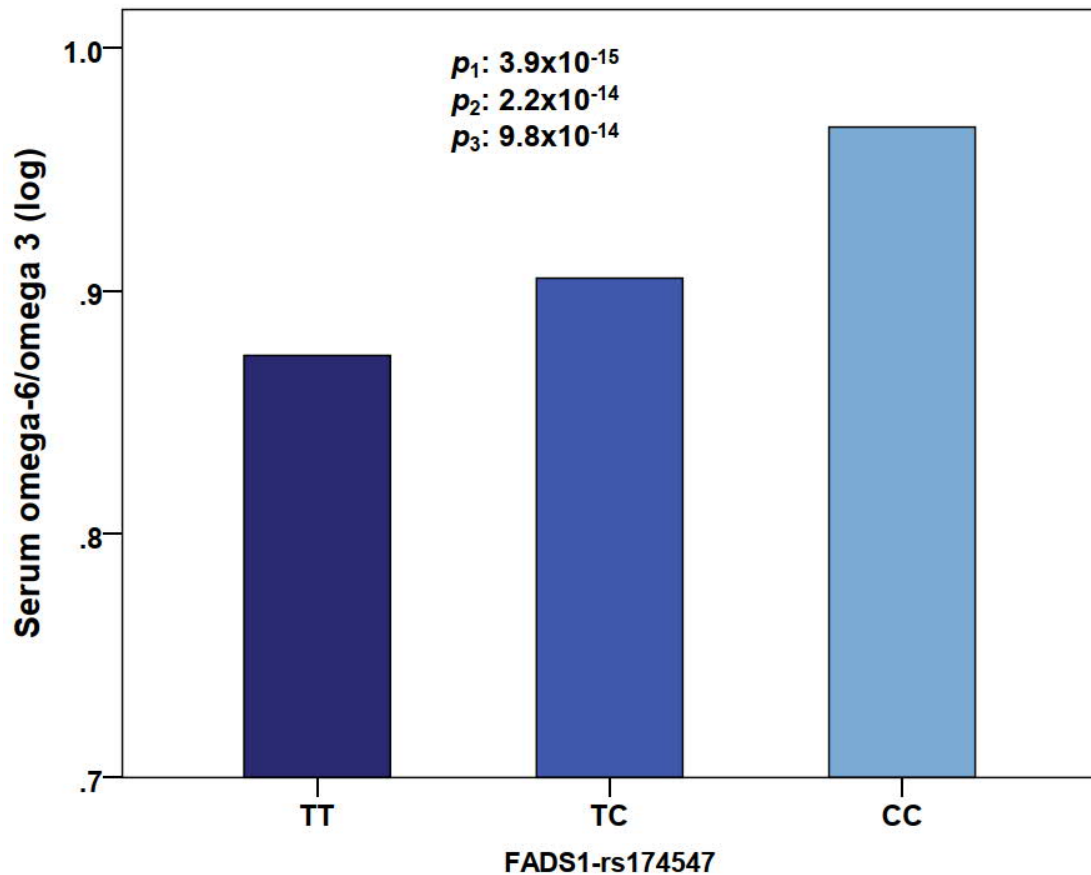

**Supplemental Figure 11.** Manhattan plot for the GWAs interaction results between the top-ranked SNPs and the adherence to the Mediterranean diet in determining serum omega-6/omega-3 PUFA ratio in the whole population. Associations were obtained from the genetic additive model and  $p$ -values were expressed as  $-\log_{10}(p\text{-value})$ . The red line represents the threshold for suggestive GWAS significance ( $-\log_{10}(1 \times 10^{-5})$ ).

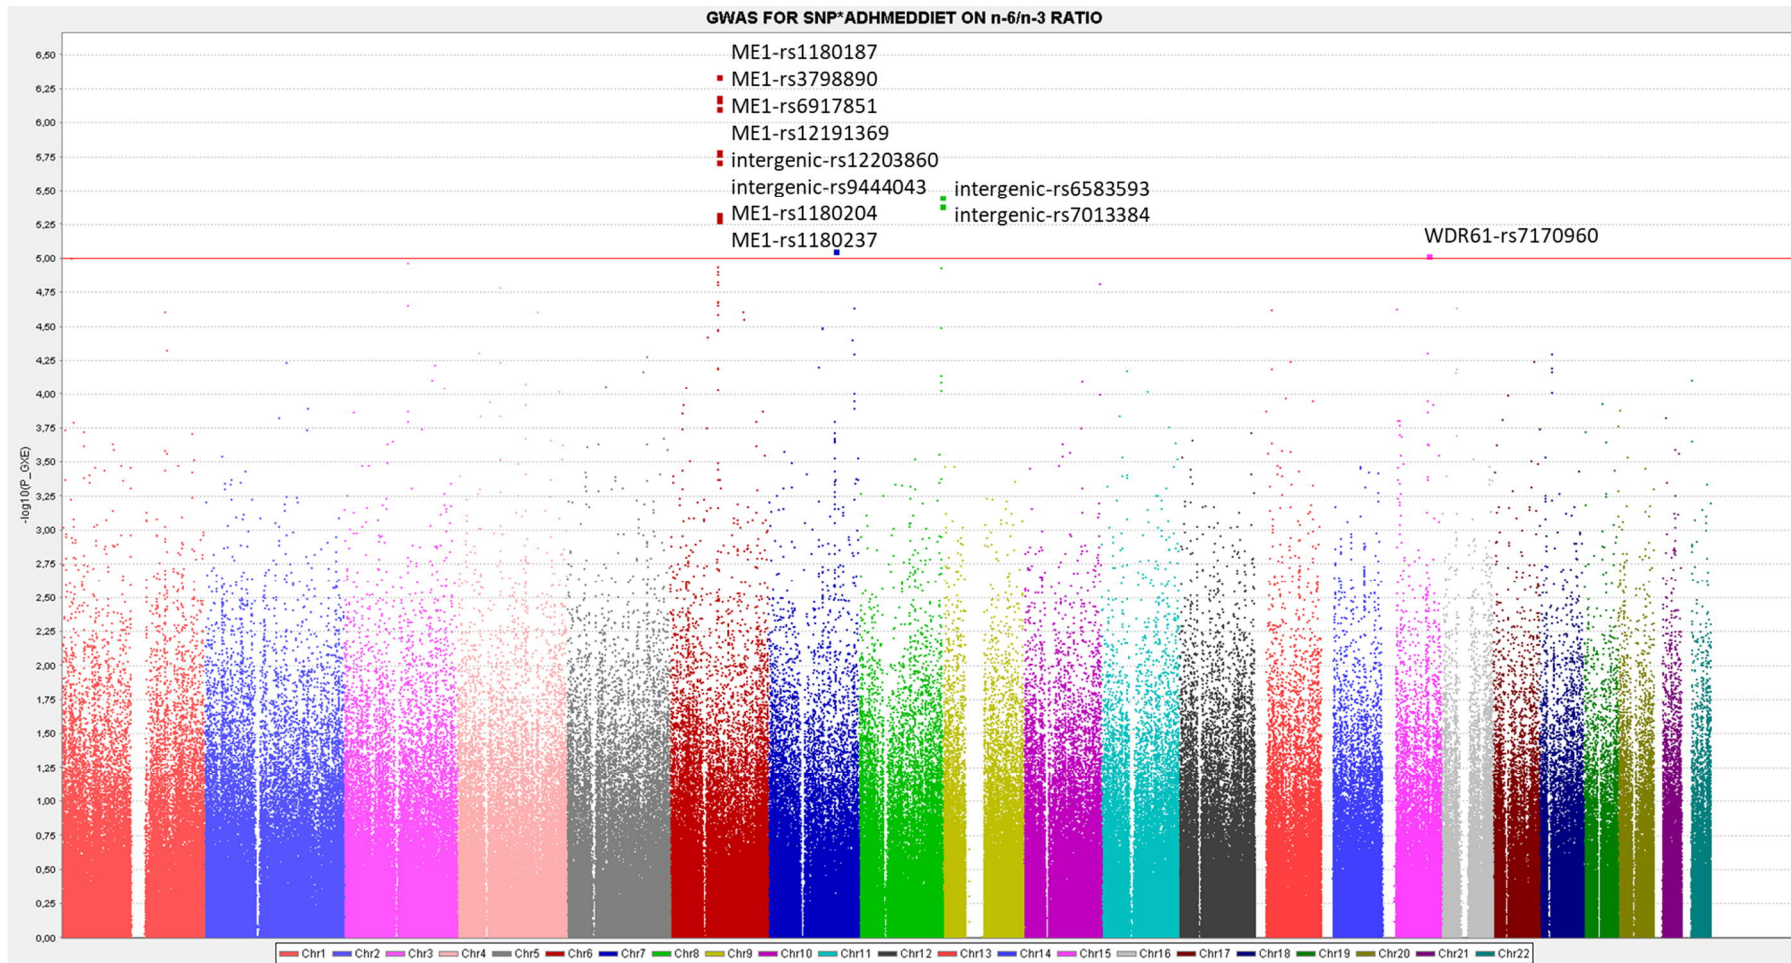



## References

In this section reference items are following the same order as the References section in the main document.

1. Chilton, F.; Dutta, R.; Reynolds, L.; Sergeant, S.; Mathias, R.; Seeds, M. Precision Nutrition and Omega-3 Polyunsaturated Fatty Acids: A Case for Personalized Supplementation Approaches for the Prevention and Management of Human Diseases. *Nutrients* 2017, 9, 1165.
2. Park, H.G.; Park, W.J.; Kothapalli, K.S.D.; Brenna, J.T. The fatty acid desaturase 2 (FADS2) gene product catalyzes  $\Delta 4$  desaturation to yield n-3 docosahexaenoic acid and n-6 docosapentaenoic acid in human cells. *The FASEB Journal* 2015, 29, 3911–3919. Ç
3. Kim, O.; Lee, S.; An, W. Impact of Blood or Erythrocyte Membrane Fatty Acids for Disease Risk Prediction: Focusing on Cardiovascular Disease and Chronic Kidney Disease. *Nutrients* 2018, 10, 1454.
